# Supplementary material for: Study protocol for a randomised controlled trial evaluating the clinical effect of antibiotic prophylaxis in children with recurrent respiratory tract infections: the Approach study
Source: PubMed Central journal article supplement — BMJ Open. 2021 Jul 29;11(7):e044505. doi: 10.1136/bmjopen-2020-044505 (PMC8323378; doi:10.1136/bmjopen-2020-044505), 2021-07-29
Supplement: bmjopen-2020-044505.draft_revisions.pdf [file bmjopen-2020-044505.draft_revisions.pdf]

# BMJ Open

BMJ Open is committed to open peer review. As part of this commitment we make the peer review history of every article we publish publicly available.

When an article is published we post the peer reviewers' comments and the authors' responses online. We also post the versions of the paper that were used during peer review. These are the versions that the peer review comments apply to.

The versions of the paper that follow are the versions that were submitted during the peer review process. They are not the versions of record or the final published versions. They should not be cited or distributed as the published version of this manuscript.

BMJ Open is an open access journal and the full, final, typeset and author-corrected version of record of the manuscript is available on our site with no access controls, subscription charges or pay-per-view fees (<http://bmjopen.bmj.com>).

If you have any questions on BMJ Open's open peer review process please email [info.bmjopen@bmj.com](mailto:info.bmjopen@bmj.com)

# BMJ Open

## Study protocol for a randomised controlled trial evaluating the clinical effects of antibiotic prophylaxis in children with recurrent respiratory tract infections: the APPROACH study

|                               |                                                                                                                                                                                                                                                                                                                                                                                                                                                                                                                                                                                                                                                                                                                                                                                                                                                                        |
|-------------------------------|------------------------------------------------------------------------------------------------------------------------------------------------------------------------------------------------------------------------------------------------------------------------------------------------------------------------------------------------------------------------------------------------------------------------------------------------------------------------------------------------------------------------------------------------------------------------------------------------------------------------------------------------------------------------------------------------------------------------------------------------------------------------------------------------------------------------------------------------------------------------|
| Journal:                      | <i>BMJ Open</i>                                                                                                                                                                                                                                                                                                                                                                                                                                                                                                                                                                                                                                                                                                                                                                                                                                                        |
| Manuscript ID                 | bmjopen-2020-044505                                                                                                                                                                                                                                                                                                                                                                                                                                                                                                                                                                                                                                                                                                                                                                                                                                                    |
| Article Type:                 | Protocol                                                                                                                                                                                                                                                                                                                                                                                                                                                                                                                                                                                                                                                                                                                                                                                                                                                               |
| Date Submitted by the Author: | 07-Sep-2020                                                                                                                                                                                                                                                                                                                                                                                                                                                                                                                                                                                                                                                                                                                                                                                                                                                            |
| Complete List of Authors:     | Peeters, Daphne; Haga Hospital Juliana Childrens Hospital, Department of paediatrics<br>van Geloven, Nan; Leiden University Medical Center, Department of Biomedical Data Sciences, Medical Statistics<br>Visser, Loes; Haga Teaching Hospital, Department of Hospital Pharmacy<br>Bogaert, Debby; University of Edinburgh, Center for Inflammation Research. Queen Medical Research Institute.; Wilhelmina Children's Hospital University Medical Centre, Department of Paediatric Infectious Diseases and Immunology<br>van Rossum, AM; Erasmus MC Sophia, Department of paediatrics<br>Driessen, Gertjan; Haga Hospital Juliana Childrens Hospital, Department of paediatrics; Maastricht UMC+, Department of paediatrics<br>Verhagen, Lilly; Wilhelmina Children's Hospital University Medical Centre, Department of Paediatric Infectious Diseases and Immunology |
| Keywords:                     | PAEDIATRICS, Paediatric infectious disease & immunisation < PAEDIATRICS, Clinical trials < THERAPEUTICS, Respiratory infections < THORACIC MEDICINE                                                                                                                                                                                                                                                                                                                                                                                                                                                                                                                                                                                                                                                                                                                    |
|                               |                                                                                                                                                                                                                                                                                                                                                                                                                                                                                                                                                                                                                                                                                                                                                                                                                                                                        |

SCHOLARONE™  
Manuscripts

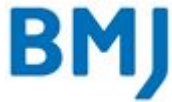

I, the Submitting Author has the right to grant and does grant on behalf of all authors of the Work (as defined in the below author licence), an exclusive licence and/or a non-exclusive licence for contributions from authors who are: i) UK Crown employees; ii) where BMJ has agreed a CC-BY licence shall apply, and/or iii) in accordance with the terms applicable for US Federal Government officers or employees acting as part of their official duties; on a worldwide, perpetual, irrevocable, royalty-free basis to BMJ Publishing Group Ltd ("BMJ") its licensees and where the relevant Journal is co-owned by BMJ to the co-owners of the Journal, to publish the Work in this journal and any other BMJ products and to exploit all rights, as set out in our [licence](#).

The Submitting Author accepts and understands that any supply made under these terms is made by BMJ to the Submitting Author unless you are acting as an employee on behalf of your employer or a postgraduate student of an affiliated institution which is paying any applicable article publishing charge ("APC") for Open Access articles. Where the Submitting Author wishes to make the Work available on an Open Access basis (and intends to pay the relevant APC), the terms of reuse of such Open Access shall be governed by a Creative Commons licence – details of these licences and which [Creative Commons](#) licence will apply to this Work are set out in our licence referred to above.

Other than as permitted in any relevant BMJ Author's Self Archiving Policies, I confirm this Work has not been accepted for publication elsewhere, is not being considered for publication elsewhere and does not duplicate material already published. I confirm all authors consent to publication of this Work and authorise the granting of this licence.

1  
2  
3 **Study protocol for a randomised controlled trial evaluating the clinical effects of antibiotic**  
4 **prophylaxis in children with recurrent respiratory tract infections: the APPROACH study**  
5  
6

7 *Trial acronym: APPROaCH study (Antibiotic ProPhylaxis for recurrent RespiratOry infections in*  
8 *CHildren).*  
9

10  
11 Mrs. Daphne Peeters, MD.

12 Department of paediatrics, Juliana Children's Hospital, The Hague, The Netherlands.

13 [D.peeters@hagaziekenhuis.nl](mailto:D.peeters@hagaziekenhuis.nl) <https://orcid.org/0000-0002-3110-9434>  
14  
15

16  
17 Dr. Nan van Geloven, PhD.

18 Department of Biomedical Data Sciences, Medical Statistics, Leiden University Medical Center,  
19 Leiden, The Netherlands. [N.van\\_Geloven@lumc.nl](mailto:N.van_Geloven@lumc.nl) <https://orcid.org/0000-0002-5600-9093>  
20  
21

22  
23 Dr. Loes E. Visser, PharmD, PhD.

24 Department of Hospital Pharmacy, Haga Teaching Hospital, The Hague, The Netherlands.

25 [l.e.visser@hagaziekenhuis.nl](mailto:l.e.visser@hagaziekenhuis.nl) <https://orcid.org/0000-0002-1421-6246>  
26  
27

28  
29 Prof. Debby Bogaert, MD, PhD.

30  
31 1. Center for Inflammation Research. Queen Medical Research Institute. University of Edinburgh, UK.  
32 [D.Bogaert@ed.ac.uk](mailto:D.Bogaert@ed.ac.uk) <https://orcid.org/0000-0003-2651-7000>  
33

34 2. Department of Paediatric Infectious Diseases and Immunology, University Medical Center Utrecht,  
35 Utrecht, The Netherlands.  
36

37  
38 Prof. Annemarie M.C. van Rossum, MD, PhD.

39 Department of paediatrics, Erasmus MC-Sophia, Rotterdam, The Netherlands.

40 [a.vanrossum@erasmusmc.nl](mailto:a.vanrossum@erasmusmc.nl) . <https://orcid.org/0000-0002-1259-477X>  
41  
42

43  
44 Dr. Gertjan J.A. Driessen\*, MD, PhD.

45 1. Department of paediatrics, Juliana Children's Hospital, The Hague, The Netherlands.

46 [G.driessen@hagaziekenhuis.nl](mailto:G.driessen@hagaziekenhuis.nl) <https://orcid.org/0000-0002-4566-9547>  
47

48 2. Department of Paediatrics, Maastricht University Medical Center+ (MUMC+), Maastricht, the  
49 Netherlands  
50

51  
52 Dr. Lilly M. Verhagen\*#, MD, M.H.Sc. Epidemiologist, PhD.

53 Department of Paediatric Infectious Diseases and Immunology, Wilhelmina Children's Hospital,  
54 Lundlaan 6, 3584 EA Utrecht, The Netherlands. [L.M.Verhagen-3@umcutrecht.nl](mailto:L.M.Verhagen-3@umcutrecht.nl)  
55

56 <https://orcid.org/0000-0002-3451-9201>  
57  
58

59 \*These authors contributed equally  
60

1  
2  
3 # Corresponding author  
4  
5

6 Word count: 3565 (excl. title page, abstract, references and tables)  
7

## 8 **ABSTRACT**

9

### 10 **Introduction**

11  
12 Respiratory tract infections (RTIs) affect children all over the world and are associated with significant  
13 morbidity and mortality. In particular recurrent RTIs cause a high burden of disease and lead to  
14 frequent doctor visits. Children with recurrent RTIs generally have no significant alterations or deficits  
15 in systemic immunity. In an attempt to treat the assumed bacterial component involved, they are often  
16 treated with prolonged courses of prophylactic antibiotics taken on a daily basis. Despite its common  
17 use, there is no evidence that this is beneficial. Studies assessing the clinical effectiveness of  
18 antibiotic prophylaxis as well as potential adverse effects, such as antibiotic resistance development,  
19 are therefore urgently needed.  
20  
21  
22  
23  
24

### 25 **Methods and analysis**

26  
27 We present a protocol for a randomized double-blind placebo-controlled trial comparing co-trimoxazole  
28 with placebo treatment in children with recurrent RTIs. A total of 158 children (aged six months – five  
29 years) with recurrent RTIs without significant comorbidity will be enrolled from a minimum of 10 Dutch  
30 hospitals. One group receives co-trimoxazole 18mg/kg twice daily (36mg/kg/day) and the other group  
31 receives a placebo twice daily for a period of three months. The main objective is to determine  
32 whether antibiotic prophylaxis is more effective than placebo to prevent/reduce respiratory symptoms  
33 in children with recurrent RTIs. Respiratory symptoms will be scored by parents on a daily basis in  
34 both study arms by use of a mobile phone application. Our primary outcome will be the number of  
35 days with at least two respiratory symptoms during treatment.  
36  
37  
38  
39  
40

### 41 **Ethics and dissemination**

42  
43 Ethics approval was obtained. A manuscript with the study results will be submitted to a peer-reviewed  
44 journal. All participants will be informed about the study results. The results of the study will inform  
45 clinical guidelines regarding the treatment of children with recurrent RTIs.  
46  
47

### 48 **Trial registration number**

49  
50 NL7044 (NTR); Pre-results.  
51  
52

### 53 **STRENGTHS AND LIMITATIONS OF THIS STUDY**

- 54  
55 • Apart from studies focusing exclusively on otitis media, this is the first randomized controlled  
56 trial that examines whether co-trimoxazole prophylaxis is effective for recurrent respiratory  
57 tract infections (RTIs) in children.  
58  
59  
60

- We will examine the clinical response to prophylactic antibiotic treatment not only during the period in which treatment is taken but also in the three months following that period, because of an extended follow-up duration of six months in total.
- We will examine predictors of treatment effect, such as clinical characteristics, microbiota parameters, and immunological characteristics.
- All children receive the same dose per kg bodyweight of co-trimoxazole and this study does not measure pharmacokinetic parameters. Therefore, we won't be able to determine the most optimal dosage of co-trimoxazol when prescribed for a prophylactic indication in children with recurrent RTIs.
- We will not enrol children with underlying chronic illnesses, such as cardiorespiratory or neuromuscular conditions, immune deficiency and congenital abnormalities, so the results of our study cannot be extrapolated to these groups of patients.

Keywords: PAEDIATRICS, paediatric infectious disease & immunisation, Clinical trials, Respiratory infections

## INTRODUCTION

### Lack of evidence-based guidelines for a common clinical problem

Young children (up to two years of age) experience symptoms of a respiratory tract infection (RTI) for a median of 44 days per year. The median number of infectious episodes is almost double in children with recurrent RTIs when compared to healthy peers.[1] Even in the absence of high-risk conditions such as major immune deficiencies or congenital malformations, some children develop many more RTIs than their peers.[2] Recurrent RTIs in children are among the leading reasons for primary care consultations and for referral to paediatricians and ear, nose and throat (ENT) specialists.[3] In developed countries, recurrent RTIs, defined as a minimum of six to eight episodes per year, affect 15-20% of children under five years of age.[4] Most children suffer from recurrent RTIs of the upper airways, but in approximately 10-30% the lower respiratory tract is also affected.[5] The high disease burden can lead to failure to thrive and developmental delays in children, as well as parental productivity losses associated with children's illness, leading to high costs for the community.[6, 7] There is no international consensus about the best treatment for children with recurrent RTIs. Previous studies suggest that antibiotic prophylaxis, treatment with the immunomodulator OM-85, active immunization and/or parental education on risk factors (passive smoking) may be at least of some benefit.[4, 8-11] In general, antibiotics are frequently used for the treatment of acute RTIs in children. In an attempt to treat the assumed bacterial component involved in recurrent RTIs, prolonged antibiotic regimens are often prescribed. Previous studies in children with recurrent acute otitis media (AOM) showed that antibiotic prophylaxis prevented one and a half episode for every 12 months of treatment per child.[12] Studies that examined the clinical effectiveness of antibiotic prophylaxis in children suffering from recurrent RTIs are scarce and mainly focus on high risk groups with recurrent lower RTIs.[8] For example, prolonged treatment with co-trimoxazole reduced mortality and hospital admissions in children with HIV.[13] Children with cancer who were treated with co-trimoxazole prophylaxis showed a decrease in pneumonia, upper respiratory tract infections and acute otitis media.[14] In children with an IgA and/or IgG subclass deficiency, the number of infections and antibiotic courses decreased after prophylactic treatment with benzathine penicillin G.[15] Additionally, penicillin prophylaxis reduced the risk of pneumococcal infections in young children with sickle cell disease[16] and azitromycin prophylaxis reduced the number of pulmonary exacerbations in children with cystic fibrosis (CF).[17, 18] For most of these high risk groups, outcomes were evaluated after at least 18 months of treatment. No studies have been performed on clinical effectiveness of antibiotic prophylaxis in otherwise healthy children who suffer from recurrent RTIs.

The antibiotic regimen that is most commonly prescribed in children with recurrent RTIs is trimethoprim/sulfamethoxazole (co-trimoxazole). Both trimethoprim and sulfamethoxazole are bacteriostatic if used alone. Combining trimethoprim and sulfamethoxazole elicits a synergistic effect and makes the antibiotic regimen bactericidal. Co-trimoxazole is a fixed antibiotic combination of trimethoprim and sulfamethoxazole (1:5) which covers most Gram-positive and Gram-negative potential pathogens as well as *Pneumocystis jiroveci*.

1  
2  
3 In this study we will compare the clinical effectiveness of co-trimoxazole prophylaxis with placebo in  
4 children with recurrent RTIs.  
5

### 6 **Role of microbiota in respiratory infection and disease**

7  
8  
9 Prolonged antibiotic treatment is of major concern, since antimicrobial resistance (AMR) development  
10 increases with duration of the antimicrobial course.[19] Probably the most important route of AMR  
11 gene selection in humans is antibiotic-induced changes to our protective microbial communities, also  
12 called the microbiota.[20] Whereas microbial disturbances elicited by antibiotic treatment in adults are  
13 mostly temporary, exposure to antibiotic treatment early in life may have a lasting impact on the  
14 composition of the microbiota leading to permanent replacement by resistant organisms.[21, 22] While  
15 the microbiota of the gastro-intestinal tract has been studied most extensively[23, 24], the human  
16 nasopharynx is considered the niche from which both upper and lower RTIs originate and resistance  
17 can also emerge in commensals or pathogens colonizing this body site.[25] During the past decade,  
18 high-throughput pipelines have become available to also characterize the complete nasopharyngeal  
19 microbiota.[26]  
20  
21

22 In this study we will examine short-term and long-term effects of co-trimoxazole prophylaxis on the  
23 microbiota composition and antibiotic resistance in children who suffer from recurrent RTIs.  
24  
25  
26  
27  
28  
29  
30  
31

### 32 **OBJECTIVES AND STUDY PARAMETERS**

33  
34 Primarily, we aim to investigate the clinical efficacy of co-trimoxazole prophylaxis in Dutch children  
35 (aged six months up to five years) with recurrent RTIs. Children will be randomized to co-trimoxazole  
36 or placebo for a treatment period of three months, since this is the treatment period after which a  
37 beneficial effect was achieved in children with recurrent acute or chronic suppurative otitis media.[12]  
38  
39

#### 40 **Primary objective**

41 To determine whether three months of prophylactic treatment with co-trimoxazole causes a reduction  
42 in the number of days a child experiences at least two RTI symptoms in children aged 6 months to  $\leq 5$   
43 years with recurrent RTIs, when compared to placebo.  
44  
45  
46  
47

#### 48 **Secondary Objectives**

49 1. To determine whether co-trimoxazole prophylactic therapy reduces:

- 50 - Time to resolution of symptoms;
  - 51 - The severity of symptoms defined by the number and type of different infectious symptoms;
  - 52 - Use of analgesics / antipyretics;
  - 53 - Use of antibiotic treatment courses;
  - 54 - Absenteeism from day care or school and/or parental absenteeism from work;
  - 55 - Alterations in nutritional status.
- 56  
57  
58  
59  
60



2. To examine predictors (e.g. demographic, environmental, family history, microbiological and immunological characteristics) for the (absence of) prophylactic treatment effect.
3. To examine whether cessation of antibiotic prophylactic treatment affects the presence of RTI symptoms and how this correlates with clinical, microbiological and immunological characteristics of the patients.
4. To record and evaluate adverse events:
  - The occurrence of mild adverse effects as described in the Summary of Product Characteristics (SPC), such as skin rash, gastro-intestinal complaints, pruritus or mild headache;
  - The occurrence of severe adverse reactions.
5. To examine short-term and long-term effects of co-trimoxazole prophylaxis on microbiota deviation, AMR and immunological outcomes.

## METHODS AND ANALYSIS

### Study design

We will conduct a randomized placebo-controlled double-blind clinical trial in which we compare co-trimoxazole with a placebo in 158 children with recurrent upper and/or lower RTIs. The inclusion and exclusion criteria are listed in table 1. We will enrol children aged six months up to five years. Children younger than six months won't participate in this study, because at this age the presence of recurrent RTIs cannot be established yet. For age-specific definitions of recurrent RTIs, we took the twofold standard deviation of the mean number of upper RTIs per year in a cohort of 1314 German children. This means yearly at least 11 parental-reported upper RTIs for children younger than two years and eight parental-reported upper RTIs for children aged two to five years.[27] Recurrent lower RTIs (i.e. pneumonia, bronchopneumonia or acute bronchitis) are defined as at least two episodes per year or three or more episodes during the child's life regardless of age. These definitions of recurrent upper and lower RTIs were also used in the Dutch national guideline for diagnostic strategies in children with recurrent RTIs.[28] If an underlying immune deficiency or contra-indication for co-trimoxazole [29] hasn't been ruled out yet, these will be tested in the blood sample taken in all participants before randomization. Children will be randomized to one of two oral suspension regimens for three months: co-trimoxazole 36 mg/kg/day (2 x 18 mg/kg) or placebo twice daily. The dose of co-trimoxazole is in accordance with the therapeutic dose (for acute infections) as described in the Dutch paediatric drug formulary. Doses and duration of treatment are also based on studies of antibiotic prophylaxis in paediatric populations with recurrent acute or chronic suppurative otitis media.[12] In case of a new RTI episode occurring during follow-up for which the child has a clinical indication to receive (additional) antibiotic treatment, the child will receive antibiotics conform national guidelines and the study medication will be discontinued for the duration of this antibiotic treatment. Medication

compliance will be measured in two ways. During the T3 visit to the hospital, parents will be asked to bring the bottles of trial medication and to answer questions about compliance. By doing so, we will be able to compare the self-reported compliance with the number of empty and (partly) full bottles that have been returned.

Table 1. Inclusion and exclusion criteria

|                    |                                                                                                                                                                                                                                                                                                                                                                                                                                                                                                                                                                                                                                                                                                                                                                                                                     |
|--------------------|---------------------------------------------------------------------------------------------------------------------------------------------------------------------------------------------------------------------------------------------------------------------------------------------------------------------------------------------------------------------------------------------------------------------------------------------------------------------------------------------------------------------------------------------------------------------------------------------------------------------------------------------------------------------------------------------------------------------------------------------------------------------------------------------------------------------|
| Inclusion criteria | <ul style="list-style-type: none"> <li>- Presenting to one of the participating clinics;</li> <li>- Age 6 months – 5 years;</li> <li>- Suffering from recurrent respiratory tract infections (RTIs)*;</li> <li>- Informed consent from parent(s)/caregiver(s) with legal custody.</li> </ul>                                                                                                                                                                                                                                                                                                                                                                                                                                                                                                                        |
| Exclusion criteria | <ul style="list-style-type: none"> <li>- Current prophylactic antibiotic use or prophylactic antibiotic use during the previous month;</li> <li>- Underlying immune deficiency other than for IgA or IgG subclasses;</li> <li>- Congenital abnormalities (including but not limited to cleft palate, neuromuscular or cardiac disorders and syndromes);</li> <li>- Suffering from chronic respiratory disease, such as cystic fibrosis (CF), primary ciliary dyskinesia (PCD) or anatomical abnormalities;</li> <li>- Only experiencing recurrent AOM or chronic suppurative otitis media without other recurrent RTIs;</li> <li>- Known allergy to co-trimoxazole;</li> <li>- Known contra-indication for co-trimoxazole, e.g. liver failure or impaired kidney function and/or haematologic disorders.</li> </ul> |

\* Recurrent upper RTIs: for children aged <2 years yearly at least 11 and for children aged 2-5 years yearly at least 8 parental-reported upper RTIs including, but not limited to, otitis media. Recurrent lower RTIs (i.e. pneumonia, bronchopneumonia or acute bronchitis) are defined as at least 2 episodes per year or 3 or more episodes during the child's life regardless of age.[27, 28]

### Randomization

The randomization procedures are performed by a member of the trial pharmacy. Randomization is computer-generated and subjects will be allocated in a 1:1 ratio with random block sizes of two, four or six subjects to prevent predictability of the allocation. Study medication is blinded for the subjects, his/her parent(s), physicians, the monitor and the study team. Only the members of the trial pharmacy have access to information on the allocation for each subject, because they are responsible for the preparation and delivery of the study medication, and for emergency de-blinding, if needed.

### Measurements

The schedule of study enrolment, interventions and measurements of endpoints is shown in table 2. For the parent-reported occurrence of symptoms of RTIs, a mobile application will be used. Previous studies used paper diaries to detect parent-reported symptoms. These are prone to non-compliance and hamper real-time detection of disease occurrence. The use of this Diary-App for symptom

recording costs parents less than one minute per day and has shown to improve case-finding and questionnaire completeness from 60% to  $\geq 90\%$ .<sup>[30]</sup> Also, parents will be asked to answer extra questions once a month. These include questions about the use of other antibiotics (see online supplementary file 1 for the monthly questionnaire).

At inclusion and after one, three and six months ( $\pm$  two weeks for each sample point) non-invasive respiratory (nasopharyngeal swab and saliva) and faecal samples for microbiota composition, immunologic analysis and AMR gene detection will be collected. Before inclusion, blood samples will be taken to test for possible contra-indications (e.g. kidney and/or liver dysfunction). After treatment we will also collect blood samples to monitor for possible kidney, liver and haematological side effects of co-trimoxazole use. Extra blood samples will be collected for additional immunological analyses at both time points. Before the start of treatment parents will be asked to fill in a questionnaire. The study will be started in a minimum of 10 hospitals in the Netherlands. Inclusion will take place during both the winter and summer period to account for seasonal differences in microbiota composition in our analyses. If necessary, the number of study locations can be extended during the study, depending on the speed of subject enrolment.

Table 2. Schedule of enrolment, intervention, and measurement of outcomes

| TIMEPOINT                             | Enrolment |       | Post-allocation |       |       |       |       |       |
|---------------------------------------|-----------|-------|-----------------|-------|-------|-------|-------|-------|
|                                       | $t_0$     | $t_r$ | $t_1$           | $t_2$ | $t_3$ | $t_4$ | $t_5$ | $t_6$ |
| ENROLMENT                             | X         |       |                 |       |       |       |       |       |
| Eligibility screen                    | X         |       |                 |       |       |       |       |       |
| Informed consent                      | X         |       |                 |       |       |       |       |       |
| Screening for exclusion criteria      | X         |       |                 |       |       |       |       |       |
| Randomization                         |           | X     |                 |       |       |       |       |       |
| INTERVENTION                          |           |       |                 |       |       |       |       |       |
| Co-trimoxazol or placebo              |           |       | ←————→          |       |       |       |       |       |
| MEASUREMENTS                          |           |       |                 |       |       |       |       |       |
| Baseline questionnaire                | X         |       |                 |       |       |       |       |       |
| Digital diary InfectionApp            |           |       | ←————→          |       |       |       |       |       |
| Questionnaire on infectious episodes  |           |       | X               | X     | X     | X     | X     | X     |
| Physical examination                  | X         |       |                 |       | X     |       |       | X     |
| Blood sample                          | X         |       |                 |       | X     |       |       |       |
| Nasopharynx, saliva and faecal sample | X         |       | X               |       | X     |       |       | X     |

### Sample size

We assumed 90% compliance with symptom monitoring via the app, i.e. app data available for  $0.90 \times 3$  months (90 days) = 81 days per participant. There is limited literature available about the number of

1  
2  
3 days with RTI symptoms per time period in children with recurrent RTIs. Toivonen et al. published a  
4 large prospective cohort study from Finland including 1089 children followed up from birth to two years  
5 of age for respiratory infections by a daily symptom diary.[1] In this study, children with recurrent RTIs  
6 (defined as number of days with symptoms >90% percentile limit) had a median of 31 days per 100  
7 days with at least one respiratory symptom. In a pilot study performed in the winter season in one of  
8 the participating centres (UMC Utrecht) including 18 children with recurrent RTIs we observed a  
9 median of 76 days with at least one respiratory symptom and a median of 42 days with at least two  
10 respiratory symptoms per 100 days (this would be 34 per 81 days). We estimated that the median  
11 number of days with at least two symptoms in the Finnish study would be  $(42/76)*31 = 17$  days per  
12 100 = 14 days per 81 days. Following, we took the average of the Finnish study and our own study to  
13 end up with an estimated median number of symptomatic days of  $(14+34)/2 = 24$  days per 81 days in  
14 the placebo group.  
15  
16  
17  
18  
19

20  
21 The IQR in the Finnish study was 104 - 136, translating into a SD of 23.7, which was  
22 comparable to the SD in our pilot study (20.5); as such we took the SD of our study for our sample  
23 size calculation since the period in which symptoms were measured in the pilot study (mean 115 days)  
24 better reflected the follow-up period of the trial (90 days) than the period in which symptoms were  
25 measured in the Toivonen study (at least one year).  
26  
27  
28

29 Assuming 24 days with at least two RTI symptoms in the placebo group and taking our aim to  
30 detect a clinically meaningful 40% reduction (i.e. a reduction of  $0.40 \times 24 = 10$  days with RTI  
31 symptoms) in the antibiotic treatment arm, we need to include 71 children per arm, so a total number  
32 of  $71 \times 2 = 142$  children, according to the Wilcoxon-Mann-Whitney test for two groups (two-tailed) with  
33 alpha 0.05 and power 80%. Including a dropout rate of 10%, this brings us to a number of  $71 / 0.9 = 79$   
34 children per arm, so a total number of 158 children.  
35  
36  
37  
38  
39  
40

## 41 **Outcomes and data analysis**

42  
43 Table 2 summarizes the assessment and sampling schedule.  
44

### 45 **Assessment of RTI symptoms**

46  
47 Descriptive statistics for demographic and clinical characteristics for both treatment allocation groups  
48 will be described. These include but are not limited to age, height, weight, ethnicity, co-morbidity,  
49 previous ENT-interventions, use of medication, the number of RTI episodes before inclusion, the  
50 severity of the infections (e.g. hospital admissions), and type of RTI (e.g. bronchiolitis, otitis,  
51 pneumonia). Also, we will examine the frequency distribution of risk factors for the development of  
52 RTIs, which include for example smoking in the household, number of siblings and daycare  
53 attendance.  
54  
55  
56  
57

58 Analyses will be performed on the basis of the 'intention-to-treat principle', comparing the treatment  
59 arm with the placebo arm, defining the treatment group based on the treatment allocation. In the  
60

1  
2  
3 intention-to-treat analysis every randomized subject will be included according to treatment  
4 assignment, thus ignoring potential non-adherence, protocol deviations, withdrawal, and anything that  
5 happens after randomization, therefore maintaining prognostic balance generated from the original  
6 random treatment allocation. The analyses will only include subjects of whom at least 80% of the  
7 symptom diary data is available. An inventory of missing data will be made and if over 5% of 142  
8 subjects have less available data than 80% of the symptom diary days, an imputation strategy will be  
9 used. We will also conduct a 'per-protocol analysis' in which we will only include the days that patients  
10 adhered to the protocolled treatment allocation. R and IBM SPSS Statistics will be used for statistical  
11 analyses.[31]  
12  
13  
14  
15

16  
17 For our primary objective, we will compare the number of days with at least two RTI symptoms during  
18 90 days of receiving antibiotic treatment / placebo. Since the actual number of monitored days may  
19 vary per patient, we will analyse the incidence rate (number of days with at least two 2 RTI symptoms  
20 divided by the total number of days monitored). We will use a negative binomial regression analysis  
21 with outcome the number of days with at least two respiratory symptoms and use the number of days  
22 monitored as offset. Our target parameter is the incidence rate ratio for treatment. We will include main  
23 effects of strong predictors of RTI symptoms in the model.  
24  
25  
26  
27

28 To determine which set of available determinants predicts heterogeneity of treatment effect, we will  
29 first develop a prediction model including well-known risk factors for the development of RTI  
30 complaints in children. These include for example age of the child, smoke exposure in the household,  
31 day-care attendance and number of siblings. In this prediction model, we will adjust for treatment  
32 allocation.[32] From this model, a summary score will be derived that is used as a risk score in the  
33 final model. The interaction between this risk score and the treatment allocation will be added as a  
34 covariate in a model for the primary outcome to investigate to what extent these host factors affect the  
35 effect of treatment on our primary outcome.  
36  
37  
38  
39  
40

41 As a secondary analysis, we will also perform a negative binomial regression analysis with number of  
42 days with at least two RTI symptoms as the dependent variable and number of monitored days as  
43 offset, during the total 0-6 month period in order to assess the outcome both during and after  
44 cessation of co-trimoxazole versus placebo. In addition, we will also apply a mixed effect model to  
45 estimate whether the pattern of RTI symptoms over time changes according to treatment allocation.  
46  
47  
48  
49

#### 50 Respiratory and gut microbiota

51  
52 For the secondary objective to detect shifts in microbiota composition in the group that received  
53 antibiotic prophylaxis compared to the placebo group, we will collect nasopharyngeal swabs  
54 (paediatric Copan e-swab with flocced nylon tip) and faecal samples from which bacterial DNA will be  
55 extracted according to previously validated methods. Swabs and faecal samples are frozen at -80°C  
56 until further analyses. Metagenomic sequencing will be conducted in order to identify the microbiota  
57  
58  
59  
60

1  
2  
3 composition and AMR genes of the faecal samples. For nasopharyngeal samples, 16S-based  
4 sequencing will be used to examine the microbiota composition.[23, 33]  
5  
6  
7

#### 8 Saliva and blood samples

9 Blood samples (peripheral blood mononuclear cells and plasma) and saliva samples will be collected  
10 at pre-determined intervals (Table 2) for immunological analyses aimed at the identification of markers  
11 associated with clinical outcome. Techniques include flow cytometry, proliferative studies, cytokine  
12 release assays and RNA expression profiling. Saliva samples will also be used for the determination of  
13 antimicrobial peptides, inflammatory cytokines and mucosal antibodies.  
14  
15  
16  
17  
18

#### 19 Data management

20  
21 Clinical data will be collected from the Electronic Medical Record by the research staff. All research  
22 data will be stored in the data management program Castor EDC. The handling of personal data will  
23 comply with the Dutch General Data Protection Regulation (in Dutch: Algemene Verordening  
24 Gegevensbescherming (AVG)). Data will be handled confidentially. The research team has access to  
25 coded data. To be able to trace data to an individual subject, a subject identification code list will be  
26 used to link the research data to the subject, which will be safeguarded by the local investigators and  
27 the trial pharmacy. This trial is monitored in accordance with the Good Clinical Practice guidelines.  
28  
29  
30  
31  
32  
33

#### 34 PATIENT AND PUBLIC INVOLVEMENT

35  
36 Because we are supported by two patient involvement groups, we feel confident that not only  
37 physicians but also patients will be open to our study results. The patient involvement groups were  
38 actively involved in the development of our study protocol. During the yearly conference day of the  
39 Foundation for Primary Immune Deficiencies ('Stichting voor Afweerstoornissen'), one of our group  
40 members (L.M. Verhagen) has discussed the use of antibiotic prophylactic treatment for mild immune  
41 deficiencies in children with patients and parents. Many patients and parents expressed their worries  
42 about prolonged antibiotic use, mainly related to its adverse effects and the possibility of future  
43 infections with resistant bacteria that can no longer be treated with antibiotics. Following this  
44 discussion, we started discussion sessions with small groups of parents of children visiting the airway  
45 clinic in the Wilhelmina Children's Hospital, UMC Utrecht, at several time points. The results showed  
46 that parents felt that more research was needed to determine whether antibiotic prophylaxis is an  
47 effective treatment. The involvement of both patient groups facilitates acceptance and implementation  
48 of our study results in the patient community. We will provide these patient support groups with our  
49 study results by publication of the outcomes in 'Paraplu', the monthly journal of the Foundation for  
50 Primary Immune Deficiencies, and by discussion of the results during meetings of the patient support  
51 groups. Also, we will send a half-yearly newsletter and an information bulletin containing the final  
52 results to the study participants.  
53  
54  
55  
56  
57  
58  
59  
60

### ETHICS AND DISSEMINATION

This study will be conducted according to the principles of the Declaration of Helsinki (2013, Brazil, version 64) and in accordance with the *Research Involving Human Subjects Act (WMO)*. The Medical Research Ethics committee LDD (Leiden, The Netherlands) has approved the study protocol. Approval of the local board of each trial site will be obtained before enrolment of the first subject in that specific hospital. This study is registered in The Netherlands National Trial Register (NTR) as Trial NL7044. After completion of this study, results will be submitted to a peer-reviewed journal.

### CURRENT TRIAL STATUS

The first subject was enrolled in January 2019. All the local boards of the first 10 trial sites have given their approval to start enrolling patients in this study, the latest approval was obtained in February 2020. If enrolment is slower than expected, a request for the addition of extra trial sites will be submitted to the Medical Research Ethics committee.

## REFERENCES

1. Toivonen L, Karppinen S, Schuez-Havupalo L, et al. Burden of Recurrent Respiratory Tract Infections in Children: A Prospective Cohort Study. *Pediatr Infect Dis J*. 2016;35(12):e362-e9. doi:10.1097/INF.0000000000001304
2. Ball TM, Holberg CJ, Aldous MB, et al. Influence of attendance at day care on the common cold from birth through 13 years of age. *Arch Pediatr Adolesc Med*. 2002;156(2):121-6.
3. Otters HB, van der Wouden JC, Schellevis FG, et al. Changing morbidity patterns in children in Dutch general practice: 1987-2001. *Eur J Gen Pract*. 2005;11(1):17-22. doi:10.3109/13814780509178011
4. Schaad UB, Esposito S, Razi CH. Diagnosis and Management of Recurrent Respiratory Tract Infections in Children: A Practical Guide. *Arch Pediatr Infect Dis*. 2016;4(1):e31039. doi:10.5812/pedinflect.31039
5. Couriel J. Assessment of the child with recurrent chest infections. *Br Med Bull*. 2002;61:115-32.
6. Murray MT, Heitkemper E, Jackson O, et al. Direct costs of acute respiratory infections in a pediatric long-term care facility. *Influenza Other Respir Viruses*. 2016;10(1):34-6. doi:10.1111/irv.12350
7. Enserink R, Lugner A, Suijkerbuijk A, et al. Gastrointestinal and respiratory illness in children that do and do not attend child day care centers: a cost-of-illness study. *PLoS One*. 2014;9(8):e104940. doi:10.1371/journal.pone.0104940
8. Onakpoya IJ, Hayward G, Heneghan CJ. Antibiotics for preventing lower respiratory tract infections in high-risk children aged 12 years and under. *Cochrane Database Syst Rev*. 2015(9):CD011530. doi:10.1002/14651858.CD011530.pub2
9. Esposito S, Bianchini S, Bosis S, et al. A randomized, placebo-controlled, double-blinded, single-centre, phase IV trial to assess the efficacy and safety of OM-85 in children suffering from recurrent respiratory tract infections. *J Transl Med*. 2019;17(1):284. doi:10.1186/s12967-019-2040-y
10. Esposito S, Marchisio P, Cavagna R, et al. Effectiveness of influenza vaccination of children with recurrent respiratory tract infections in reducing respiratory-related morbidity within the households. *Vaccine*. 2003;21(23):3162-8. doi:10.1016/s0264-410x(03)00253-6
11. Bugova G, Janickova M, Uhliarova B, et al. The effect of passive smoking on bacterial colonisation of the upper airways and selected laboratory parameters in children. *Acta Otorhinolaryngol Ital*. 2018;38(5):431-8. doi:10.14639/0392-100X-1573
12. Leach AJ, Morris PS. Antibiotics for the prevention of acute and chronic suppurative otitis media in children. *Cochrane Database Syst Rev*. 2006(4):CD004401. doi:10.1002/14651858.CD004401.pub2
13. Chintu C, Bhat GJ, Walker AS, et al. Co-trimoxazole as prophylaxis against opportunistic infections in HIV-infected Zambian children (CHAP): a double-blind randomised placebo-controlled trial. *Lancet*. 2004;364(9448):1865-71. doi:10.1016/S0140-6736(04)17442-4
14. Hughes WT, Kuhn S, Chaudhary S, et al. Successful chemoprophylaxis for *Pneumocystis carinii* pneumonitis. *N Engl J Med*. 1977;297(26):1419-26. doi:10.1056/NEJM197712292972602
15. Genel F, Kutukculer N. Prospective, randomized comparison of OM-85 BV and a prophylactic antibiotic in children with recurrent infections and immunoglobulin A and/or G subclass deficiency. *Curr Ther Res Clin Exp*. 2003;64(8):600-15. doi:10.1016/j.curtheres.2003.09.008
16. Rankine-Mullings AE, Owusu-Ofori S. Prophylactic antibiotics for preventing pneumococcal infection in children with sickle cell disease. *Cochrane Database Syst Rev*. 2017;10:CD003427. doi:10.1002/14651858.CD003427.pub4
17. Saiman L, Anstead M, Mayer-Hamblett N, et al. Effect of azithromycin on pulmonary function in patients with cystic fibrosis uninfected with *Pseudomonas aeruginosa*: a randomized controlled trial. *JAMA*. 2010;303(17):1707-15. doi:10.1001/jama.2010.563



- 1  
2  
3 18. Clement A, Tamalet A, Leroux E, et al. Long term effects of azithromycin in patients with  
4 cystic fibrosis: A double blind, placebo controlled trial. *Thorax*. 2006;61(10):895-902.  
5 doi:10.1136/thx.2005.057950  
6  
7 19. Wolf J. Antibiotic resistance threatens the efficacy of prophylaxis. *Lancet Infect Dis*.  
8 2015;15(12):1368-9. doi:10.1016/S1473-3099(15)00317-5  
9  
10 20. Pettigrew MM, Johnson JK, Harris AD. The human microbiota: novel targets for hospital-  
11 acquired infections and antibiotic resistance. *Ann Epidemiol*. 2016;26(5):342-7.  
12 doi:10.1016/j.annepidem.2016.02.007  
13  
14 21. Bedford Russell AR, Murch SH. Could peripartum antibiotics have delayed health  
15 consequences for the infant? *BJOG*. 2006;113(7):758-65. doi:10.1111/j.1471-0528.2006.00952.x  
16  
17 22. Moore AM, Patel S, Forsberg KJ, et al. Pediatric fecal microbiota harbor diverse and novel  
18 antibiotic resistance genes. *PLoS One*. 2013;8(11):e78822. doi:10.1371/journal.pone.0078822  
19  
20 23. Reyman M, van Houten MA, van Baarle D, et al. Impact of delivery mode-associated gut  
21 microbiota dynamics on health in the first year of life. *Nat Commun*. 2019;10(1):4997.  
22 doi:10.1038/s41467-019-13014-7  
23  
24 24. Sommer MO, Dantas G. Antibiotics and the resistant microbiome. *Curr Opin Microbiol*.  
25 2011;14(5):556-63. doi:10.1016/j.mib.2011.07.005  
26  
27 25. Bogaert D, de GR, Hermans PW. Streptococcus pneumoniae colonisation: the key to  
28 pneumococcal disease. *Lancet Infect Dis*. 2004;4(3):144-54.  
29  
30 26. Biesbroek G, Sanders EA, Roeselers G, et al. Deep sequencing analyses of low density  
31 microbial communities: working at the boundary of accurate microbiota detection. *PLoS one*.  
32 2012;7(3):e32942. doi:10.1371/journal.pone.0032942  
33  
34 27. Gruber C, Keil T, Kulig M, et al. History of respiratory infections in the first 12 yr among  
35 children from a birth cohort. *Pediatr Allergy Immunol*. 2008;19(6):505-12. doi:10.1111/j.1399-  
36 3038.2007.00688.x  
37  
38 28. ErasmusMC-Sophia in collaboration with the pulmonary, infectious diseases and immunology  
39 section of the Dutch Paediatric Society, Dutch College of General Practitioners (NHG) and 'Stichting  
40 kind en ziekenhuis'. (2016). Evidence-based richtlijn diagnostiek naar onderliggende aandoeningen  
41 bij kinderen met recidiverende luchtweginfecties. Retrieved from  
42 <https://www.kinderinfectieziekten.nl/>.  
43  
44 29. Summary of Product Characteristics (SmPC) CO-TRIMOXAZOL, Medicines Evaluation Board  
45 (MEB) The Netherlands, RVG 10550 SPC 0817.23v.RS  
46  
47 30. Prins-van Ginkel AC, de Hoog M, Uiterwaal C, et al. Detecting Acute Otitis Media Symptom  
48 Episodes Using a Mobile App: Cohort Study. *JMIR Mhealth Uhealth*. 2017;5(11):e181.  
49 doi:10.2196/mhealth.7505  
50  
51 31. R Core Team (2019). R: A language and environment for statistical computing. R Foundation  
52 for Statistical Computing, Vienna, Austria. URL <https://www.R-project.org/>.  
53  
54 32. Kent DM, Paulus JK, van Klaveren D, et al. The Predictive Approaches to Treatment effect  
55 Heterogeneity (PATH) Statement. *Ann Intern Med*. 2019. doi:10.7326/M18-3667  
56  
57 33. Man WH, van Houten MA, Merelle ME, et al. Bacterial and viral respiratory tract microbiota  
58 and host characteristics in children with lower respiratory tract infections: a matched case-control  
59 study. *Lancet Respir Med*. 2019;7(5):417-26. doi:10.1016/S2213-2600(18)30449-1  
60

### Authors' contributions

All authors helped with the design of this study and approved the final manuscript. DP, LMV and GD wrote the first draft of the study protocol and manuscript. NG was consulted for the statistical analysis plan for this study. LV helped designing the trial medication and advised on improving safety measures in relation to the trial medication. DB was consulted for the secondary outcomes on microbiota composition and AMR genes. AvR was consulted for the design of the study.

### Funding statement

This study was supported by the Elisabeth von Freyburg fonds, 'Stichting Kiddy Goodpills' and the Haga Teaching Hospital. Award/Grant number is not applicable.

### Competing interests statement

None declared.

### Ethics approval

This study has been approved by the Medical Research Ethics committee LDD (Leiden, The Netherlands) and is registered in the Netherlands National Trial Register (NTR) as Trial NL7044.

Supplementary file 1

**Monthly questionnaire for participants of the Approach study**

1. Did you consult a physician for your child because of a respiratory tract infection in the past month?

- Yes, the paediatrician of our own hospital
- Yes, the general practitioner
- Yes, the otolaryngologist
- Yes, another physician
- No

1b. If yes, how many times did your child visit a physician because of a respiratory tract infection in the past month?

2. Did you consult a physician for your child because of a stomach infection or gastro-enteritis in the past month?

- Yes, the paediatrician of our own hospital
- Yes, the general practitioner
- Yes, another physician
- No

2b. If yes, how many times did your child visit a physician because of a stomach infection or gastro-enteritis in the past month?

3. Did your child take any antibiotics in the past month?

- Yes, prescribed by the paediatrician of our own hospital
- Yes, prescribed by the general practitioner
- Yes, prescribed by the otolaryngologist
- Yes, prescribed by another physician
- No

*Question 4 and 5 are only applicable if question 3 is answered 'Yes'.*

4. How many antibiotic regimens did your child use in the past month?

*The (sub)questions of question 5 are asked for every antibiotic regimen separately.*

5a. For what infection was your child treated with antibiotics? (multiple choice)

- Rhinitis
- Otitis
- Tonsillitis
- Bronchitis or pulmonary infection
- Stomach infection or gastroenteritis
- Other infection (other than respiratory or gastro-intestinal infection)

5b. Which date did your child start with the antibiotic treatment?

DD/MM/YYYY

5c. Which date did your child stop with the antibiotic treatment?

DD/MM/YYYY

1  
2  
3  
4 5d. What is the name of the antibiotic regimen?  
5

6 6. Did your child get any vaccines in the past month? (multiple choice)  
7

- 8  No  
9  DKTP-Hib-HepB  
10  Pneumococcal  
11  MMR  
12  Meningococcal C  
13  Other vaccine  
14

15  
16 7. Has your child been admitted to the hospital because of an (suspected) infection in the past  
17 month?  
18

- 19  Yes  
20  No  
21

22 7b. If yes, for what infection was your child admitted to the hospital? (multiple choice)  
23

- 24  Rhinitis  
25  Otitis  
26  Throat infection / tonsillitis  
27  Bronchitis or pulmonary infection  
28  Stomach infection or gastroenteritis  
29  Other infection (other than respiratory or gastro-intestinal infection)  
30

31 7c. If yes, how many days has your child been admitted to the hospital in the past month?  
32

33 8. Did your child visit any form of day-care in the past month?  
34

- 35  Yes  
36  No  
37

38 8b. If yes, how many half days\* did your child visit day-care in the past month?  
39

40 8c. If yes, how many half days\* did your child miss from day-care because of an infection in the past  
41 month?  
42

43 \* A half day is a morning or an afternoon.  
44

45 9. Did you or your partner miss work due to your child having an infection during the past three  
46 months?  
47

- 48  Yes  
49  No  
50

51 9b. If yes, how many half days\* did you and your partner miss combined?  
52

53 \* A half day is a morning or an afternoon.  
54

55 10. Do you have any additional comments about the past month?  
56  
57  
58  
59  
60

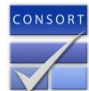

## CONSORT 2010 checklist of information to include when reporting a randomised trial\*

| Section/Topic                    | Item No | Checklist item                                                                                                                                                                              | Reported on page No |
|----------------------------------|---------|---------------------------------------------------------------------------------------------------------------------------------------------------------------------------------------------|---------------------|
| <b>Title and abstract</b>        |         |                                                                                                                                                                                             |                     |
|                                  | 1a      | Identification as a randomised trial in the title                                                                                                                                           | 1                   |
|                                  | 1b      | Structured summary of trial design, methods, results, and conclusions (for specific guidance see CONSORT for abstracts)                                                                     | 2                   |
| <b>Introduction</b>              |         |                                                                                                                                                                                             |                     |
| Background and objectives        | 2a      | Scientific background and explanation of rationale                                                                                                                                          | 4-5                 |
|                                  | 2b      | Specific objectives or hypotheses                                                                                                                                                           | 5-6                 |
| <b>Methods</b>                   |         |                                                                                                                                                                                             |                     |
| Trial design                     | 3a      | Description of trial design (such as parallel, factorial) including allocation ratio                                                                                                        | 6-7                 |
|                                  | 3b      | Important changes to methods after trial commencement (such as eligibility criteria), with reasons                                                                                          | NA                  |
| Participants                     | 4a      | Eligibility criteria for participants                                                                                                                                                       | 7 (table 1)         |
|                                  | 4b      | Settings and locations where the data were collected                                                                                                                                        | 7-8                 |
| Interventions                    | 5       | The interventions for each group with sufficient details to allow replication, including how and when they were actually administered                                                       | 6-8                 |
| Outcomes                         | 6a      | Completely defined pre-specified primary and secondary outcome measures, including how and when they were assessed                                                                          | 5-6                 |
|                                  | 6b      | Any changes to trial outcomes after the trial commenced, with reasons                                                                                                                       | NA                  |
| Sample size                      | 7a      | How sample size was determined                                                                                                                                                              | 9                   |
|                                  | 7b      | When applicable, explanation of any interim analyses and stopping guidelines                                                                                                                | NA                  |
| <b>Randomisation:</b>            |         |                                                                                                                                                                                             |                     |
| Sequence generation              | 8a      | Method used to generate the random allocation sequence                                                                                                                                      | 7                   |
|                                  | 8b      | Type of randomisation; details of any restriction (such as blocking and block size)                                                                                                         | 7                   |
| Allocation concealment mechanism | 9       | Mechanism used to implement the random allocation sequence (such as sequentially numbered containers), describing any steps taken to conceal the sequence until interventions were assigned | 7                   |
| Implementation                   | 10      | Who generated the random allocation sequence, who enrolled participants, and who assigned participants to interventions                                                                     | 7-8                 |
| Blinding                         | 11a     | If done, who was blinded after assignment to interventions (for example, participants, care providers, those                                                                                | 7                   |

|                                                      |     |                                                                                                                                                   |      |
|------------------------------------------------------|-----|---------------------------------------------------------------------------------------------------------------------------------------------------|------|
|                                                      |     | assessing outcomes) and how                                                                                                                       |      |
|                                                      | 11b | If relevant, description of the similarity of interventions                                                                                       | -    |
| Statistical methods                                  | 12a | Statistical methods used to compare groups for primary and secondary outcomes                                                                     | 9-11 |
|                                                      | 12b | Methods for additional analyses, such as subgroup analyses and adjusted analyses                                                                  | 9-11 |
| <b>Results</b>                                       |     |                                                                                                                                                   |      |
| Participant flow (a diagram is strongly recommended) | 13a | For each group, the numbers of participants who were randomly assigned, received intended treatment, and were analysed for the primary outcome    | NA   |
|                                                      | 13b | For each group, losses and exclusions after randomisation, together with reasons                                                                  | NA   |
| Recruitment                                          | 14a | Dates defining the periods of recruitment and follow-up                                                                                           | NA   |
|                                                      | 14b | Why the trial ended or was stopped                                                                                                                | NA   |
| Baseline data                                        | 15  | A table showing baseline demographic and clinical characteristics for each group                                                                  | NA   |
| Numbers analysed                                     | 16  | For each group, number of participants (denominator) included in each analysis and whether the analysis was by original assigned groups           | NA   |
| Outcomes and estimation                              | 17a | For each primary and secondary outcome, results for each group, and the estimated effect size and its precision (such as 95% confidence interval) | NA   |
|                                                      | 17b | For binary outcomes, presentation of both absolute and relative effect sizes is recommended                                                       | NA   |
| Ancillary analyses                                   | 18  | Results of any other analyses performed, including subgroup analyses and adjusted analyses, distinguishing pre-specified from exploratory         | NA   |
| Harms                                                | 19  | All important harms or unintended effects in each group (for specific guidance see CONSORT for harms)                                             | NA   |
| <b>Discussion</b>                                    |     |                                                                                                                                                   |      |
| Limitations                                          | 20  | Trial limitations, addressing sources of potential bias, imprecision, and, if relevant, multiplicity of analyses                                  | 1-2  |
| Generalisability                                     | 21  | Generalisability (external validity, applicability) of the trial findings                                                                         | -    |
| Interpretation                                       | 22  | Interpretation consistent with results, balancing benefits and harms, and considering other relevant evidence                                     | -    |
| <b>Other information</b>                             |     |                                                                                                                                                   |      |
| Registration                                         | 23  | Registration number and name of trial registry                                                                                                    | 1    |
| Protocol                                             | 24  | Where the full trial protocol can be accessed, if available                                                                                       | NA   |
| Funding                                              | 25  | Sources of funding and other support (such as supply of drugs), role of funders                                                                   | 15   |

\*We strongly recommend reading this statement in conjunction with the CONSORT 2010 Explanation and Elaboration for important clarifications on all the items. If relevant, we also recommend reading CONSORT extensions for cluster randomised trials, non-inferiority and equivalence trials, non-pharmacological treatments, herbal interventions, and pragmatic trials. Additional extensions are forthcoming: for those and for up to date references relevant to this checklist, see [www.consort-statement.org](http://www.consort-statement.org).

# BMJ Open

## Study protocol for a randomised controlled trial evaluating the clinical effects of antibiotic prophylaxis in children with recurrent respiratory tract infections: the APPROACH study

|                                 |                                                                                                                                                                                                                                                                                                                                                                                                                                                                                                                                                                                                                                                                                                                                                                                                                                                                                                                                                    |
|---------------------------------|----------------------------------------------------------------------------------------------------------------------------------------------------------------------------------------------------------------------------------------------------------------------------------------------------------------------------------------------------------------------------------------------------------------------------------------------------------------------------------------------------------------------------------------------------------------------------------------------------------------------------------------------------------------------------------------------------------------------------------------------------------------------------------------------------------------------------------------------------------------------------------------------------------------------------------------------------|
| Journal:                        | <i>BMJ Open</i>                                                                                                                                                                                                                                                                                                                                                                                                                                                                                                                                                                                                                                                                                                                                                                                                                                                                                                                                    |
| Manuscript ID                   | bmjopen-2020-044505.R1                                                                                                                                                                                                                                                                                                                                                                                                                                                                                                                                                                                                                                                                                                                                                                                                                                                                                                                             |
| Article Type:                   | Protocol                                                                                                                                                                                                                                                                                                                                                                                                                                                                                                                                                                                                                                                                                                                                                                                                                                                                                                                                           |
| Date Submitted by the Author:   | 31-Mar-2021                                                                                                                                                                                                                                                                                                                                                                                                                                                                                                                                                                                                                                                                                                                                                                                                                                                                                                                                        |
| Complete List of Authors:       | Peeters, Daphne; Haga Hospital Juliana Childrens Hospital, Department of paediatrics<br>van Geloven, Nan; Leiden University Medical Center, Department of Biomedical Data Sciences, Medical Statistics<br>Visser, Loes; Haga Teaching Hospital, Department of Hospital Pharmacy; Erasmus MC, Department of Hospital Pharmacy and Department of Epidemiology<br>Bogaert, Debby; University of Edinburgh, Center for Inflammation Research. Queen Medical Research Institute.; Wilhelmina Children's Hospital University Medical Centre, Department of Paediatric Infectious Diseases and Immunology<br>van Rossum, AM; Erasmus MC Sophia, Department of paediatrics<br>Driessen, Gertjan; Haga Hospital Juliana Childrens Hospital, Department of paediatrics; Maastricht UMC+, Department of paediatrics<br>Verhagen, Lilly; Wilhelmina Children's Hospital University Medical Centre, Department of Paediatric Infectious Diseases and Immunology |
| <b>Primary Subject Heading</b>: | Paediatrics                                                                                                                                                                                                                                                                                                                                                                                                                                                                                                                                                                                                                                                                                                                                                                                                                                                                                                                                        |
| Secondary Subject Heading:      | Infectious diseases, Evidence based practice, Pharmacology and therapeutics, Research methods                                                                                                                                                                                                                                                                                                                                                                                                                                                                                                                                                                                                                                                                                                                                                                                                                                                      |
| Keywords:                       | PAEDIATRICS, Paediatric infectious disease & immunisation < PAEDIATRICS, Clinical trials < THERAPEUTICS, Respiratory infections < THORACIC MEDICINE                                                                                                                                                                                                                                                                                                                                                                                                                                                                                                                                                                                                                                                                                                                                                                                                |
|                                 |                                                                                                                                                                                                                                                                                                                                                                                                                                                                                                                                                                                                                                                                                                                                                                                                                                                                                                                                                    |

SCHOLARONE™  
Manuscripts



I, the Submitting Author has the right to grant and does grant on behalf of all authors of the Work (as defined in the below author licence), an exclusive licence and/or a non-exclusive licence for contributions from authors who are: i) UK Crown employees; ii) where BMJ has agreed a CC-BY licence shall apply, and/or iii) in accordance with the terms applicable for US Federal Government officers or employees acting as part of their official duties; on a worldwide, perpetual, irrevocable, royalty-free basis to BMJ Publishing Group Ltd ("BMJ") its licensees and where the relevant Journal is co-owned by BMJ to the co-owners of the Journal, to publish the Work in this journal and any other BMJ products and to exploit all rights, as set out in our [licence](#).

The Submitting Author accepts and understands that any supply made under these terms is made by BMJ to the Submitting Author unless you are acting as an employee on behalf of your employer or a postgraduate student of an affiliated institution which is paying any applicable article publishing charge ("APC") for Open Access articles. Where the Submitting Author wishes to make the Work available on an Open Access basis (and intends to pay the relevant APC), the terms of reuse of such Open Access shall be governed by a Creative Commons licence – details of these licences and which [Creative Commons](#) licence will apply to this Work are set out in our licence referred to above.

Other than as permitted in any relevant BMJ Author's Self Archiving Policies, I confirm this Work has not been accepted for publication elsewhere, is not being considered for publication elsewhere and does not duplicate material already published. I confirm all authors consent to publication of this Work and authorise the granting of this licence.



1  
2  
3 **Study protocol for a randomised controlled trial evaluating the clinical effects of antibiotic**  
4 **prophylaxis in children with recurrent respiratory tract infections: the APPROACH study**  
5  
6

7 *Trial acronym: APPROaCH study (Antibiotic ProPhylaxis for recurrent RespiratOry infections in*  
8 *CHildren).*  
9

10  
11 Mrs. Daphne Peeters, MD.

12 Department of paediatrics, Juliana Children's Hospital, The Hague, The Netherlands.

13 [D.peeters@hagaziekenhuis.nl](mailto:D.peeters@hagaziekenhuis.nl) <https://orcid.org/0000-0002-3110-9434>  
14  
15

16  
17 Dr. Nan van Geloven, PhD.

18 Department of Biomedical Data Sciences, Medical Statistics, Leiden University Medical Center,  
19 Leiden, The Netherlands. [N.van\\_Geloven@lumc.nl](mailto:N.van_Geloven@lumc.nl) <https://orcid.org/0000-0002-5600-9093>  
20  
21

22  
23 Dr. Loes E. Visser, PharmD, PhD.

24 1. Department of Hospital Pharmacy, Haga Teaching Hospital, The Hague, The Netherlands.

25 [l.e.visser@hagaziekenhuis.nl](mailto:l.e.visser@hagaziekenhuis.nl) <https://orcid.org/0000-0002-1421-6246>  
26

27 2. Department of Hospital Pharmacy, Erasmus MC, Rotterdam, The Netherlands  
28

29 3. Department of Epidemiology, Erasmus MC, Rotterdam, The Netherlands  
30

31  
32 Prof. Debby Bogaert, MD, PhD.

33 1. Center for Inflammation Research. Queen Medical Research Institute. University of Edinburgh, UK.

34 [D.Bogaert@ed.ac.uk](mailto:D.Bogaert@ed.ac.uk) <https://orcid.org/0000-0003-2651-7000>  
35

36 2. Department of Paediatric Infectious Diseases and Immunology, University Medical Center Utrecht,  
37 Utrecht, The Netherlands.  
38

39  
40  
41 Prof. Annemarie M.C. van Rossum, MD, PhD.

42 Department of paediatrics, Erasmus MC-Sophia, Rotterdam, The Netherlands.

43 [a.vanrossum@erasmusmc.nl](mailto:a.vanrossum@erasmusmc.nl) . <https://orcid.org/0000-0002-1259-477X>  
44  
45

46  
47 Prof. Dr. Gertjan J.A. Driessen\*, MD, PhD.

48 1. Department of paediatrics, Juliana Children's Hospital, The Hague, The Netherlands.

49 [G.driessen@hagaziekenhuis.nl](mailto:G.driessen@hagaziekenhuis.nl) <https://orcid.org/0000-0002-4566-9547>  
50

51 2. Department of Paediatrics, Maastricht University Medical Center+ (MUMC+), Maastricht, the  
52 Netherlands  
53

54  
55 Dr. Lilly M. Verhagen\*\*, MD, M.H.Sc. Epidemiologist, PhD.

56 Department of Paediatric Infectious Diseases and Immunology, Wilhelmina Children's Hospital,

57 Lundlaan 6, 3584 EA Utrecht, The Netherlands. [L.M.Verhagen-3@umcutrecht.nl](mailto:L.M.Verhagen-3@umcutrecht.nl)  
58

59 <https://orcid.org/0000-0002-3451-9201>  
60

1  
2  
3  
4 \*These authors contributed equally

5  
6 # Corresponding author

7  
8  
9 Word count: 3469 (excl. title page, abstract, references and tables)

## 10 **ABSTRACT**

### 11 **Introduction**

12  
13  
14  
15 Respiratory tract infections (RTIs) affect children all over the world and are associated with significant  
16 morbidity and mortality. In particular recurrent RTIs cause a high burden of disease and lead to  
17 frequent doctor visits. Children with recurrent RTIs generally have no significant alterations or deficits  
18 in systemic immunity. In an attempt to treat the assumed bacterial component involved, they are often  
19 treated with prolonged courses of prophylactic antibiotics taken on a daily basis. Despite its common  
20 use, there is no evidence that this is beneficial. Studies assessing the clinical effectiveness of  
21 antibiotic prophylaxis as well as potential adverse effects and antibiotic resistance development, are  
22 therefore urgently needed.

### 23 **Methods and analysis**

24  
25  
26  
27  
28 We present a protocol for a randomized double-blind placebo-controlled trial comparing co-trimoxazole  
29 with placebo treatment in children with recurrent RTIs. A total of 158 children (aged six months – ten  
30 years) with recurrent RTIs without significant comorbidity will be enrolled from a minimum of 10 Dutch  
31 hospitals. One group receives co-trimoxazole 18mg/kg twice daily (36mg/kg/day) and the other group  
32 receives a placebo twice daily for a period of three months. The main objective is to determine  
33 whether antibiotic prophylaxis is more effective than placebo to prevent/reduce respiratory symptoms  
34 in children with recurrent RTIs. Respiratory symptoms will be scored by parents on a daily basis in  
35 both study arms by use of a mobile phone application. Our primary outcome will be the number of  
36 days with at least two respiratory symptoms during treatment.

### 37 **Ethics and dissemination**

38  
39  
40  
41  
42  
43  
44  
45  
46  
47  
48  
49  
50  
51  
52  
53  
54  
55  
56  
57  
58  
59  
60  
Ethics approval was obtained. A manuscript with the study results will be submitted to a peer-reviewed  
journal. All participants will be informed about the study results. The results of the study will inform  
clinical guidelines regarding the treatment of children with recurrent RTIs.

### 59 **Trial registration number**

60  
NL7044 (NTR); Pre-results.

## STRENGTHS AND LIMITATIONS OF THIS STUDY

- Apart from studies focusing exclusively on otitis media, this is the first randomized controlled trial that examines whether co-trimoxazole prophylaxis is effective for recurrent respiratory tract infections (RTIs) in children.
- We will examine the clinical response to prophylactic antibiotic treatment not only during the period in which treatment is taken but also in the three months following that period, because of an extended follow-up duration of six months in total.
- We will examine predictors of treatment effect, such as clinical characteristics, microbiota parameters, and immunological characteristics.
- All children receive the same dose per kg bodyweight of co-trimoxazole and this study does not measure pharmacokinetic parameters. Therefore, we won't be able to determine the most optimal dosage of co-trimoxazol when prescribed for a prophylactic indication in children with recurrent RTIs.
- We will not enrol children with underlying chronic illnesses, such as cardiorespiratory or neuromuscular conditions, immune deficiency and congenital abnormalities, so the results of our study cannot be extrapolated to these groups of patients.

Keywords: PAEDIATRICS, paediatric infectious disease & immunisation, Clinical trials, Respiratory infections

## INTRODUCTION

### Lack of evidence-based guidelines for a common clinical problem

Young children (up to two years of age) experience symptoms of a respiratory tract infection (RTI) for a median of 44 days per year. The median number of infectious episodes is almost double in children with recurrent RTIs when compared to healthy peers.[1] Even in the absence of high-risk conditions such as major immune deficiencies or congenital malformations, some children develop many more RTIs than their peers.[2] Recurrent RTIs in children are among the leading reasons for primary care consultations and for referral to paediatricians and ear, nose and throat (ENT) specialists.[3] In developed countries, recurrent RTIs, defined as a minimum of six to eight episodes per year, affect 15-20% of children under five years of age.[4] Most children suffer from recurrent RTIs of the upper airways, but in approximately 10-30% the lower respiratory tract is also affected.[5] Compared to their healthy peers, children with recurrent RTIs often visit the outpatient clinic and they more often need hospitalization. In addition, these children are treated more frequently with medication, e.g. inhaled bronchodilators and corticosteroids as well as antibiotics.[1] The high disease burden can also lead to failure to thrive and developmental delays in children, as well as parental productivity losses associated with children's illness and absenteeism from work, leading to high costs for the community.[1, 6, 7] Lower RTIs in childhood can also lead to pulmonary sequelae such as bronchiectasis and irreversible lung damage [8-10], putting children with recurrent RTIs even more at risk for long-term damage. There is no international consensus about the best treatment for children with recurrent RTIs. Previous studies suggest that antibiotic prophylaxis, treatment with the immunomodulator OM-85, active immunization and/or parental education on risk factors (passive smoking) may be at least of some benefit.[4, 11-14] In general, antibiotics are frequently used for the treatment of acute RTIs in children. In an attempt to treat the assumed bacterial component involved in recurrent RTIs, prolonged antibiotic regimens are often prescribed. Previous studies in children with recurrent acute otitis media (AOM) showed that antibiotic prophylaxis prevented one and a half episode for every 12 months of treatment per child.[15] Studies that examined the clinical effectiveness of antibiotic prophylaxis in children suffering from recurrent RTIs are scarce and mainly focus on high risk groups with recurrent lower RTIs.[11, 16-21] No studies have been performed on clinical effectiveness of antibiotic prophylaxis in otherwise healthy children who suffer from recurrent RTIs.

The antibiotic regimen that is most commonly prescribed in children with recurrent RTIs is trimethoprim/sulfamethoxazole (co-trimoxazole). Both trimethoprim and sulfamethoxazole are bacteriostatic if used alone. Combining trimethoprim and sulfamethoxazole elicits a synergistic effect and makes the antibiotic regimen bactericidal. Co-trimoxazole is a fixed antibiotic combination of trimethoprim and sulfamethoxazole (1:5) which covers most Gram-positive and Gram-negative potential pathogens as well as *Pneumocystis jiroveci*. In addition, several studies suggest that co-trimoxazole has an immunomodulatory effect which could enhance the immune response.[22-25] The combination of antimicrobial and immunomodulatory properties could provide an additional beneficial effect in the prevention or reduction of RTIs.

1  
2  
3 In this study we will compare the clinical effectiveness of co-trimoxazole prophylaxis with placebo in  
4 children with recurrent RTIs.  
5

## 6 **Role of microbiota in respiratory infection and disease**

7  
8  
9 Prolonged antibiotic treatment is of major concern, since antimicrobial resistance (AMR) development  
10 increases with duration of the antimicrobial course.[26] Probably the most important route of AMR  
11 gene selection in humans is antibiotic-induced changes to our protective microbial communities, also  
12 called the microbiota.[27] Whereas microbial disturbances elicited by antibiotic treatment in adults are  
13 mostly temporary, exposure to antibiotic treatment early in life may have a lasting impact on the  
14 composition of the microbiota leading to permanent replacement by resistant organisms.[28, 29] While  
15 the microbiota of the gastro-intestinal tract has been studied most extensively[30, 31], the human  
16 nasopharynx is considered the niche from which both upper and lower RTIs originate and resistance  
17 can also emerge in commensals or pathogens colonizing this body site.[32] During the past decade,  
18 high-throughput pipelines have become available to also characterize the complete nasopharyngeal  
19 microbiota.[33]

20  
21 In this study we will examine short-term and long-term effects of co-trimoxazole prophylaxis on the  
22 microbiota composition and antibiotic resistance in children who suffer from recurrent RTIs.  
23  
24  
25

## 26 **METHODS AND ANALYSIS**

### 27 **Objectives and study parameters**

28  
29 Primarily, we aim to investigate the clinical efficacy of co-trimoxazole prophylaxis in Dutch children  
30 (aged six months up to ten years) with recurrent RTIs. Children will be randomized to co-trimoxazole  
31 or placebo for a treatment period of three months, since this is the treatment period after which a  
32 beneficial effect was achieved in children with recurrent acute or chronic suppurative otitis media.[15]

#### 33 *Primary objective*

34  
35 To determine whether three months of prophylactic treatment with co-trimoxazole causes a reduction  
36 in the number of days a child experiences at least two RTI symptoms in children aged 6 months to  $\leq 10$   
37 years with recurrent RTIs, when compared to placebo.  
38  
39

#### 40 *Secondary Objectives*

41  
42 1. To determine whether co-trimoxazole prophylactic therapy reduces:

- 43 - Time to resolution of symptoms;
  - 44 - The severity of symptoms defined by the number and type of different infectious symptoms;
  - 45 - Use of analgesics / antipyretics;
  - 46 - Use of antibiotic treatment courses;
  - 47 - Absenteeism from day care or school and/or parental absenteeism from work;
  - 48 - Alterations in nutritional status.
- 49  
50  
51  
52  
53  
54  
55  
56  
57  
58  
59  
60

2. To examine predictors (e.g. demographic, environmental, family history, mucosal, microbiological and immunological characteristics) for the (absence of) prophylactic treatment effect
3. To examine whether cessation of antibiotic prophylactic treatment affects the presence of RTI symptoms and how this correlates with clinical, microbiological and immunological characteristics of the patients.
4. To record and evaluate adverse events:
  - The occurrence of mild adverse effects as described in the Summary of Product Characteristics (SPC), such as skin rash, gastro-intestinal complaints, pruritus or mild headache;
  - The occurrence of severe adverse reactions.
5. To examine short-term and long-term effects of co-trimoxazole prophylaxis on microbiota deviation, AMR and (mucosal and systemic) immunological outcomes.

### Study design

We will conduct a randomized placebo-controlled double-blind clinical trial in which we compare co-trimoxazole with a placebo in 158 children with recurrent upper and/or lower RTIs. The inclusion and exclusion criteria are listed in table 1. We will enrol children aged six months up to ten years. Children younger than six months won't participate in this study, because at this age the presence of recurrent RTIs cannot be established yet. For age-specific definitions of recurrent RTIs, we took the twofold standard deviation of the mean number of upper RTIs per year in a cohort of 1314 German children, except for children aged 5-10 years, in whom we used the same definition as younger children (2-5 years). This means that we define recurrent RTIs as at least 11 parental-reported upper RTIs for children younger than two years and eight parental-reported upper RTIs for children aged two to ten years per year.[34] Recurrent lower RTIs (i.e. pneumonia, bronchopneumonia or acute bronchitis) are defined as at least two episodes per year or three or more episodes during the child's life regardless of age. These definitions of recurrent upper and lower RTIs were also used in the Dutch national guideline for diagnostic strategies in children with recurrent RTIs.[35] If an underlying immune deficiency or contra-indication for co-trimoxazole [36] hasn't been ruled out yet, these will be tested in the blood sample taken in all participants before randomization. Children will be randomized to one of two oral suspension regimens for three months: co-trimoxazole 36 mg/kg/day (2 x 18 mg/kg) or placebo twice daily. The dose of co-trimoxazole is in accordance with the therapeutic dose (for acute infections) as described in the Dutch paediatric drug formulary. Doses and duration of treatment are also based on studies of antibiotic prophylaxis in paediatric populations with recurrent acute or chronic suppurative otitis media.[15] In case of a new RTI episode occurring during follow-up for which the child has a clinical indication to receive (additional) antibiotic treatment, the child will receive antibiotics

that conform to national guidelines and the study medication will be discontinued for the duration of this antibiotic treatment. Medication compliance will be measured in two ways. During the T3 visit to the hospital, parents will be asked to bring the bottles of trial medication and to answer questions about compliance. By doing so, we will be able to compare the self-reported compliance with the number of empty and (partly) full bottles that have been returned.

Table 1. Inclusion and exclusion criteria

|                    |                                                                                                                                                                                                                                                                                                                                                                                                                                                                                                                                                                                                                                                                                                                                                                                                                     |
|--------------------|---------------------------------------------------------------------------------------------------------------------------------------------------------------------------------------------------------------------------------------------------------------------------------------------------------------------------------------------------------------------------------------------------------------------------------------------------------------------------------------------------------------------------------------------------------------------------------------------------------------------------------------------------------------------------------------------------------------------------------------------------------------------------------------------------------------------|
| Inclusion criteria | <ul style="list-style-type: none"> <li>- Presenting to one of the participating clinics;</li> <li>- Age 6 months – 10 years;</li> <li>- Suffering from recurrent respiratory tract infections (RTIs)*;</li> <li>- Informed consent from parent(s)/caregiver(s) with legal custody.</li> </ul>                                                                                                                                                                                                                                                                                                                                                                                                                                                                                                                       |
| Exclusion criteria | <ul style="list-style-type: none"> <li>- Current prophylactic antibiotic use or prophylactic antibiotic use during the previous month;</li> <li>- Underlying immune deficiency other than for IgA or IgG subclasses;</li> <li>- Congenital abnormalities (including but not limited to cleft palate, neuromuscular or cardiac disorders and syndromes);</li> <li>- Suffering from chronic respiratory disease, such as cystic fibrosis (CF), primary ciliary dyskinesia (PCD) or anatomical abnormalities;</li> <li>- Only experiencing recurrent AOM or chronic suppurative otitis media without other recurrent RTIs;</li> <li>- Known allergy to co-trimoxazole;</li> <li>- Known contra-indication for co-trimoxazole, e.g. liver failure or impaired kidney function and/or haematologic disorders.</li> </ul> |

\* Recurrent upper RTIs: for children aged <2 years yearly at least 11 and for children aged 2-10 years yearly at least 8 parental-reported upper RTIs including, but not limited to, otitis media. Recurrent lower RTIs (i.e. pneumonia, bronchopneumonia or acute bronchitis) are defined as at least 2 episodes per year or 3 or more episodes during the child's life regardless of age.[34, 35]

### Randomization

The randomization procedures are performed by a member of the trial pharmacy. Randomization is computer-generated and subjects will be allocated in a 1:1 ratio with random block sizes of two, four or six subjects to prevent predictability of the allocation. Study medication is blinded for the subjects, his/her parent(s), physicians, the monitor and the study team. Only the members of the trial pharmacy have access to information on the allocation for each subject, because they are responsible for the preparation and delivery of the study medication, and for emergency de-blinding, if needed.

### Measurements

The schedule of study enrolment, interventions and measurements of endpoints is shown in table 2. For the parent-reported occurrence of symptoms of RTIs, a mobile application will be used. Previous studies used paper diaries to detect parent-reported symptoms. These are prone to non-compliance

and hamper real-time detection of disease occurrence. The use of this Diary-App for symptom recording costs parents less than one minute per day and has shown to improve case-finding and questionnaire completeness from 60% to  $\geq 90\%$ .<sup>[37]</sup> Also, parents will be asked to answer extra questions once a month. These include questions about the use of other antibiotics (see online supplementary file 1 for the monthly questionnaire).

At inclusion and after one, three and six months ( $\pm$  two weeks for each sample point) non-invasive respiratory (nasopharyngeal swab and saliva) and faecal samples for microbiota composition, immunologic analysis and AMR gene detection will be collected. Also, these samples could be used for viral analysis. In addition, mucosal lining fluid will be collected at two time points in at least 50 subjects. Before inclusion, blood samples will be taken to test for possible contra-indications (e.g. kidney and/or liver dysfunction). After treatment we will also collect blood samples to monitor for possible kidney, liver and haematological side effects of co-trimoxazole use. Extra blood samples will be collected for additional immunological analyses at both time points. Before the start of treatment parents will be asked to fill in a questionnaire. The study will be started in a minimum of 10 hospitals in the Netherlands. Inclusion will take place during both the winter and summer period to account for seasonal differences in microbiota composition in our analyses. If necessary, the number of study locations can be extended during the study, depending on the speed of subject enrolment.

Table 2. Schedule of enrolment, intervention, and measurement of outcomes

|                                       | Enrolment |       | Post-allocation |       |       |       |       |       |
|---------------------------------------|-----------|-------|-----------------|-------|-------|-------|-------|-------|
| <b>TIMEPOINT</b>                      | $t_0$     | $t_r$ | $t_1$           | $t_2$ | $t_3$ | $t_4$ | $t_5$ | $t_6$ |
| <b>ENROLMENT</b>                      | X         |       |                 |       |       |       |       |       |
| Eligibility screen                    | X         |       |                 |       |       |       |       |       |
| Informed consent                      | X         |       |                 |       |       |       |       |       |
| Screening for exclusion criteria      | X         |       |                 |       |       |       |       |       |
| Randomization                         |           | X     |                 |       |       |       |       |       |
| <b>INTERVENTION</b>                   |           |       |                 |       |       |       |       |       |
| Co-trimoxazol or placebo              |           |       | ←————→          |       |       |       |       |       |
| <b>MEASUREMENTS</b>                   |           |       |                 |       |       |       |       |       |
| Baseline questionnaire                | X         |       |                 |       |       |       |       |       |
| Digital diary InfectionApp            |           |       | ←————→          |       |       |       |       |       |
| Questionnaire on infectious episodes  |           |       | X               | X     | X     | X     | X     | X     |
| Physical examination                  | X         |       |                 |       | X     |       |       | X     |
| Blood sample                          | X         |       |                 |       | X     |       |       |       |
| Nasopharynx, saliva and faecal sample | X         |       | X               |       | X     |       |       | X     |
| Mucosal lining fluid sample*          | X         |       | X               |       | (X)   |       |       | (X)   |

\*Sampling at 2/4 time points, preferably T0 and T1.



## Sample size

We assumed 90% compliance with symptom monitoring via the app, i.e. app data available for 0.90 x 3 months (90 days) = 81 days per participant. There is limited literature available about the number of days with RTI symptoms per time period in children with recurrent RTIs. Toivonen et al. published a large prospective cohort study from Finland including 1089 children followed up from birth to two years of age for respiratory infections by a daily symptom diary.[1] In this study, children with recurrent RTIs (defined as number of days with symptoms >90% percentile limit) had a median of 31 days per 100 days with at least one respiratory symptom. In a pilot study performed in the winter season in one of the participating centres (UMC Utrecht) including 18 children with recurrent RTIs we observed a median of 76 days with at least one respiratory symptom and a median of 42 days with at least two respiratory symptoms per 100 days (this would be 34 per 81 days). We estimated that the median number of days with at least two symptoms in the Finnish study would be  $(42/76) \times 31 = 17$  days per 100 = 14 days per 81 days. Following, we took the average of the Finnish study and our own study to end up with an estimated median number of symptomatic days of  $(14+34)/2 = 24$  days per 81 days in the placebo group.

The IQR in the Finnish study was 104 - 136, translating into a SD of 23.7, which was comparable to the SD in our pilot study (20.5); as such we took the SD of our study for our sample size calculation since the period in which symptoms were measured in the pilot study (mean 115 days) better reflected the follow-up period of the trial (90 days) than the period in which symptoms were measured in the Toivonen study (at least one year).

Assuming 24 days with at least two RTI symptoms in the placebo group and taking our aim to detect a clinically meaningful 40% reduction (i.e. a reduction of  $0.40 \times 24 = 10$  days with RTI symptoms) in the antibiotic treatment arm, we need to include 71 children per arm, so a total number of  $71 \times 2 = 142$  children, according to the Wilcoxon-Mann-Whitney test for two groups (two-tailed) with  $\alpha$  0.05 and power 80%. Including a dropout rate of 10%, this brings us to a number of  $71 / 0.9 = 79$  children per arm, so a total number of 158 children.

## Outcomes and data analysis

Table 2 summarizes the assessment and sampling schedule.

### Assessment of RTI symptoms

Descriptive statistics for demographic and clinical characteristics for both treatment allocation groups will be described. These include but are not limited to age, height, weight, ethnicity, co-morbidity, previous ENT-interventions, use of medication, the number of RTI episodes before inclusion, the severity of the infections (e.g. hospital admissions), and type of RTI (e.g. bronchiolitis, otitis, pneumonia). Also, we will examine the frequency distribution of risk factors for the development of

1  
2  
3 RTIs, which include for example smoking in the household, number of siblings and daycare  
4 attendance.  
5

6  
7 Analyses will be performed on the basis of the 'intention-to-treat principle', comparing the treatment  
8 arm with the placebo arm, defining the treatment group based on the treatment allocation. In the  
9 intention-to-treat analysis every randomized subject will be included according to treatment  
10 assignment, thus ignoring potential non-adherence, protocol deviations, withdrawal, and anything that  
11 happens after randomization, therefore maintaining prognostic balance generated from the original  
12 random treatment allocation. The analyses will only include subjects of whom at least 80% of the  
13 symptom diary data is available. An inventory of missing data will be made and if over 5% of 142  
14 subjects have less available data than 80% of the symptom diary days, an imputation strategy will be  
15 used. We will also conduct a 'per-protocol analysis' in which we will only include the days that patients  
16 adhered to the protocolled treatment allocation. R and IBM SPSS Statistics will be used for statistical  
17 analyses.[38]  
18  
19  
20  
21  
22

23 For our primary objective, we will compare the number of days with at least two RTI symptoms during  
24 90 days of receiving antibiotic treatment / placebo. Since the actual number of monitored days may  
25 vary per patient, we will analyse the incidence rate (number of days with at least two 2 RTI symptoms  
26 divided by the total number of days monitored). We will use a negative binomial regression analysis  
27 with outcome the number of days with at least two respiratory symptoms and use the number of days  
28 monitored as offset. Our target parameter is the incidence rate ratio for treatment. We will include main  
29 effects of strong predictors of RTI symptoms in the model.  
30  
31  
32  
33  
34

35 To determine which set of available determinants predicts heterogeneity of treatment effect, we will  
36 first develop a prediction model including well-known risk factors for the development of RTI  
37 complaints in children. These include for example age of the child, smoke exposure in the household,  
38 day-care attendance and number of siblings. In this prediction model, we will adjust for treatment  
39 allocation.[39] From this model, a summary score will be derived that is used as a risk score in the  
40 final model. The interaction between this risk score and the treatment allocation will be added as a  
41 covariate in a model for the primary outcome to investigate to what extent these host factors affect the  
42 effect of treatment on our primary outcome.  
43  
44  
45  
46  
47

48 As a secondary analysis, we will also perform a negative binominal regression analysis with number of  
49 days with at least two RTI symptoms as the dependent variable and number of monitored days as  
50 offset, during the total 0-6 month period in order to assess the outcome both during and after  
51 cessation of co-trimoxazole versus placebo. In addition, we will also apply a mixed effect model to  
52 estimate whether the pattern of RTI symptoms over time changes according to treatment allocation.  
53  
54  
55

## 56 Respiratory and gut microbiota

57  
58 For the secondary objective to detect shifts in microbiota composition in the group that received  
59 antibiotic prophylaxis compared to the placebo group, we will collect nasopharyngeal swabs  
60

1  
2  
3 (paediatric Copan e-swab with flocced nylon tip) and faecal samples from which bacterial DNA will be  
4 extracted according to previously validated methods. Swabs and faecal samples are frozen at -80°C  
5 until further analyses. Metagenomic sequencing will be conducted in order to identify the microbiota  
6 composition and AMR genes of the faecal samples. For nasopharyngeal samples, 16S-based  
7 sequencing will be used to examine the microbiota composition.[30, 40]  
8  
9

10  
11  
12 Saliva, blood and mucosal lining fluid samples

13  
14 Blood samples (peripheral blood mononuclear cells and plasma), saliva samples and mucosal lining  
15 fluid will be collected at pre-determined intervals (Table 2) for immunological analyses aimed at the  
16 identification of markers associated with clinical outcome. Techniques include flow cytometry,  
17 proteomics, proliferative studies, cytokine release assays and RNA expression profiling. Saliva  
18 samples will also be used for the determination of antimicrobial peptides, inflammatory cytokines,  
19 proteomics and mucosal antibodies. Mucosal lining fluid will be used to measure (protein) immune  
20 markers such as antibodies, chemokines and cytokines.  
21  
22  
23  
24  
25

## 26 **Data management**

27  
28 Clinical data will be collected from the Electronic Medical Record by the research staff. All research  
29 data will be stored in the data management program Castor EDC. The handling of personal data will  
30 comply with the Dutch General Data Protection Regulation (in Dutch: Algemene Verordening  
31 Gegevensbescherming (AVG)). Data will be handled confidentially. The research team has access to  
32 coded data. To be able to trace data to an individual subject, a subject identification code list will be  
33 used to link the research data to the subject, which will be safeguarded by the local investigators and  
34 the trial pharmacy. This trial is monitored in accordance with the Good Clinical Practice guidelines.  
35  
36  
37  
38  
39  
40

## 41 **PATIENT AND PUBLIC INVOLVEMENT**

42  
43 Because we are supported by two patient involvement groups, we feel confident that not only  
44 physicians but also patients will be open to our study results. The patient involvement groups were  
45 actively involved in the development of our study protocol. During the yearly conference day of the  
46 Foundation for Primary Immune Deficiencies ('Stichting voor Afweerstoornissen'), one of our group  
47 members (L.M. Verhagen) has discussed the use of antibiotic prophylactic treatment for mild immune  
48 deficiencies in children with patients and parents. Many patients and parents expressed their worries  
49 about prolonged antibiotic use, mainly related to its adverse effects and the possibility of future  
50 infections with resistant bacteria that can no longer be treated with antibiotics. Following this  
51 discussion, we started discussion sessions with small groups of parents of children visiting the airway  
52 clinic in the Wilhelmina Children's Hospital, UMC Utrecht, at several time points. The results showed  
53 that parents felt that more research was needed to determine whether antibiotic prophylaxis is an  
54 effective treatment. The involvement of both patient groups facilitates acceptance and implementation  
55  
56  
57  
58  
59  
60

1  
2  
3 of our study results in the patient community. We will provide these patient support groups with our  
4 study results by publication of the outcomes in 'Paraplu', the monthly journal of the Foundation for  
5 Primary Immune Deficiencies, and by discussion of the results during meetings of the patient support  
6 groups. Also, we will send a half-yearly newsletter and an information bulletin containing the final  
7 results to the study participants.  
8  
9

## 10 **ETHICS AND DISSEMINATION**

11  
12  
13 This study will be conducted according to the principles of the Declaration of Helsinki (2013, Brazil,  
14 version 64) and in accordance with the *Research Involving Human Subjects Act (WMO)*. The Medical  
15 Research Ethics committee LDD (Leiden, The Netherlands) has approved the study protocol. Approval  
16 of the local board of each trial site will be obtained before enrolment of the first subject in that specific  
17 hospital. This study is registered in The Netherlands National Trial Register (NTR) as Trial NL7044.  
18 After completion of this study, results will be submitted to a peer-reviewed journal.  
19  
20  
21  
22  
23  
24

## 25 **CURRENT TRIAL STATUS**

26  
27 The first subject was enrolled in January 2019. All the local boards of the first 10 trial sites have given  
28 their approval to start enrolling patients in this study, the latest approval was obtained in February  
29 2020. If enrolment is slower than expected, a request for the addition of extra trial sites will be  
30 submitted to the Medical Research Ethics committee.  
31  
32  
33  
34  
35  
36  
37  
38  
39  
40  
41  
42  
43  
44  
45  
46  
47  
48  
49  
50  
51  
52  
53  
54  
55  
56  
57  
58  
59  
60

## REFERENCES

1. Toivonen L, Karppinen S, Schuez-Havupalo L, et al. Burden of Recurrent Respiratory Tract Infections in Children: A Prospective Cohort Study. *Pediatr Infect Dis J*. 2016;35(12):e362-e9. doi:10.1097/INF.0000000000001304
2. Ball TM, Holberg CJ, Aldous MB, et al. Influence of attendance at day care on the common cold from birth through 13 years of age. *Arch Pediatr Adolesc Med*. 2002;156(2):121-6.
3. Otters HB, van der Wouden JC, Schellevis FG, et al. Changing morbidity patterns in children in Dutch general practice: 1987-2001. *Eur J Gen Pract*. 2005;11(1):17-22. doi:10.3109/13814780509178011
4. Schaad UB, Esposito S, Razi CH. Diagnosis and Management of Recurrent Respiratory Tract Infections in Children: A Practical Guide. *Arch Pediatr Infect Dis*. 2016;4(1):e31039. doi:10.5812/pedinflect.31039
5. Couriel J. Assessment of the child with recurrent chest infections. *Br Med Bull*. 2002;61:115-32.
6. Murray MT, Heitkemper E, Jackson O, et al. Direct costs of acute respiratory infections in a pediatric long-term care facility. *Influenza Other Respir Viruses*. 2016;10(1):34-6. doi:10.1111/irv.12350
7. Enserink R, Lugner A, Suijkerbuijk A, et al. Gastrointestinal and respiratory illness in children that do and do not attend child day care centers: a cost-of-illness study. *PLoS One*. 2014;9(8):e104940. doi:10.1371/journal.pone.0104940
8. Edmond K, Scott S, Korczak V, et al. Long term sequelae from childhood pneumonia; systematic review and meta-analysis. *PLoS One*. 2012;7(2):e31239. doi:10.1371/journal.pone.0031239
9. Brower KS, Del Vecchio MT, Aronoff SC. The etiologies of non-CF bronchiectasis in childhood: a systematic review of 989 subjects. *BMC Pediatr*. 2014;14:4. doi:10.1186/s12887-014-0299-y
10. Thomson C, Myer L, Zar HJ. The Impact of Pneumonia on Development of Chronic Respiratory Illness in Childhood. *Pediatric Allergy, Immunology, and Pulmonology*. Volume: 23 Issue 4 2011; 279-290.
11. Onakpoya IJ, Hayward G, Heneghan CJ. Antibiotics for preventing lower respiratory tract infections in high-risk children aged 12 years and under. *Cochrane Database Syst Rev*. 2015(9):CD011530. doi:10.1002/14651858.CD011530.pub2
12. Esposito S, Bianchini S, Bosis S, et al. A randomized, placebo-controlled, double-blinded, single-centre, phase IV trial to assess the efficacy and safety of OM-85 in children suffering from recurrent respiratory tract infections. *J Transl Med*. 2019;17(1):284. doi:10.1186/s12967-019-2040-y
13. Esposito S, Marchisio P, Cavagna R, et al. Effectiveness of influenza vaccination of children with recurrent respiratory tract infections in reducing respiratory-related morbidity within the households. *Vaccine*. 2003;21(23):3162-8. doi:10.1016/s0264-410x(03)00253-6
14. Bugova G, Janickova M, Uhliarova B, et al. The effect of passive smoking on bacterial colonisation of the upper airways and selected laboratory parameters in children. *Acta Otorhinolaryngol Ital*. 2018;38(5):431-8. doi:10.14639/0392-100X-1573
15. Leach AJ, Morris PS. Antibiotics for the prevention of acute and chronic suppurative otitis media in children. *Cochrane Database Syst Rev*. 2006(4):CD004401. doi:10.1002/14651858.CD004401.pub2
16. Chintu C, Bhat GJ, Walker AS, et al. Co-trimoxazole as prophylaxis against opportunistic infections in HIV-infected Zambian children (CHAP): a double-blind randomised placebo-controlled trial. *Lancet*. 2004;364(9448):1865-71. doi:10.1016/S0140-6736(04)17442-4
17. Hughes WT, Kuhn S, Chaudhary S, et al. Successful chemoprophylaxis for *Pneumocystis carinii* pneumonitis. *N Engl J Med*. 1977;297(26):1419-26. doi:10.1056/NEJM197712292972602
18. Genel F, Kutukculer N. Prospective, randomized comparison of OM-85 BV and a prophylactic antibiotic in children with recurrent infections and immunoglobulin A and/or G subclass deficiency. *Curr Ther Res Clin Exp*. 2003;64(8):600-15. doi:10.1016/j.curtheres.2003.09.008

19. Rankine-Mullings AE, Owusu-Ofori S. Prophylactic antibiotics for preventing pneumococcal infection in children with sickle cell disease. *Cochrane Database Syst Rev.* 2017;10:CD003427. doi:10.1002/14651858.CD003427.pub4
20. Saiman L, Anstead M, Mayer-Hamblett N, et al. Effect of azithromycin on pulmonary function in patients with cystic fibrosis uninfected with *Pseudomonas aeruginosa*: a randomized controlled trial. *JAMA.* 2010;303(17):1707-15. doi:10.1001/jama.2010.563
21. Clement A, Tamalet A, Leroux E, et al. Long term effects of azithromycin in patients with cystic fibrosis: A double blind, placebo controlled trial. *Thorax.* 2006;61(10):895-902. doi:10.1136/thx.2005.057950
22. Church JA, Fitzgerald F, Walker AS, et al. The expanding role of co-trimoxazole in developing countries. *Lancet Infect Dis.* 2015;15(3):327-39. doi:10.1016/S1473-3099(14)71011-4
23. Ghilchik MW, Morris AS, Reeves DS. Immunosuppressive powers of the antibacterial agent trimethoprim. *Nature.* 1970;227(5256):393-4. doi:10.1038/227393a0
24. Rozin A, Schapira D, Braun-Moscovici Y, et al. Cotrimoxazole treatment for rheumatoid arthritis. *Semin Arthritis Rheum.* 2001;31(2):133-41. doi:10.1053/sarh.2001.27734
25. Emmanouilides CE, Lianou PE, Bassaris HP, et al. Trimethoprim, sulphamethoxazole, bacterial adhesion and polymorphonuclear leucocyte function. *J Antimicrob Chemother.* 1990;26(6):803-12. doi:10.1093/jac/26.6.803
26. Wolf J. Antibiotic resistance threatens the efficacy of prophylaxis. *Lancet Infect Dis.* 2015;15(12):1368-9. doi:10.1016/S1473-3099(15)00317-5
27. Pettigrew MM, Johnson JK, Harris AD. The human microbiota: novel targets for hospital-acquired infections and antibiotic resistance. *Ann Epidemiol.* 2016;26(5):342-7. doi:10.1016/j.annepidem.2016.02.007
28. Bedford Russell AR, Murch SH. Could peripartum antibiotics have delayed health consequences for the infant? *BJOG.* 2006;113(7):758-65. doi:10.1111/j.1471-0528.2006.00952.x
29. Moore AM, Patel S, Forsberg KJ, et al. Pediatric fecal microbiota harbor diverse and novel antibiotic resistance genes. *PLoS One.* 2013;8(11):e78822. doi:10.1371/journal.pone.0078822
30. Reyman M, van Houten MA, van Baarle D, et al. Impact of delivery mode-associated gut microbiota dynamics on health in the first year of life. *Nat Commun.* 2019;10(1):4997. doi:10.1038/s41467-019-13014-7
31. Sommer MO, Dantas G. Antibiotics and the resistant microbiome. *Curr Opin Microbiol.* 2011;14(5):556-63. doi:10.1016/j.mib.2011.07.005
32. Bogaert D, de GR, Hermans PW. Streptococcus pneumoniae colonisation: the key to pneumococcal disease. *Lancet Infect Dis.* 2004;4(3):144-54.
33. Biesbroek G, Sanders EA, Roeselers G, et al. Deep sequencing analyses of low density microbial communities: working at the boundary of accurate microbiota detection. *PLoS one.* 2012;7(3):e32942. doi:10.1371/journal.pone.0032942
34. Gruber C, Keil T, Kulig M, et al. History of respiratory infections in the first 12 yr among children from a birth cohort. *Pediatr Allergy Immunol.* 2008;19(6):505-12. doi:10.1111/j.1399-3038.2007.00688.x
35. ErasmusMC-Sophia in collaboration with the pulmonary, infectious diseases and immunology section of the Dutch Paediatric Society, Dutch College of General Practitioners (NHG) and 'Stichting kind en ziekenhuis'. (2016). Evidence-based richtlijn diagnostiek naar onderliggende aandoeningen bij kinderen met recidiverende luchtweginfecties. Retrieved from <https://www.kinderinfectieziekten.nl/>.
36. Summary of Product Characteristics (SmPC) CO-TRIMOXAZOL, Medicines Evaluation Board (MEB) The Netherlands, RVG 10550 SPC 0817.23v.RS
37. Prins-van Ginkel AC, de Hoog M, Uiterwaal C, et al. Detecting Acute Otitis Media Symptom Episodes Using a Mobile App: Cohort Study. *JMIR Mhealth Uhealth.* 2017;5(11):e181. doi:10.2196/mhealth.7505
38. R Core Team (2019). R: A language and environment for statistical computing. R Foundation for Statistical Computing, Vienna, Austria. URL <https://www.R-project.org/>.

1  
2  
3 39. Kent DM, Paulus JK, van Klaveren D, et al. The Predictive Approaches to Treatment effect  
4 Heterogeneity (PATH) Statement. *Ann Intern Med*. 2019. doi:10.7326/M18-3667

5 40. Man WH, van Houten MA, Merelle ME, et al. Bacterial and viral respiratory tract microbiota  
6 and host characteristics in children with lower respiratory tract infections: a matched case-control  
7 study. *Lancet Respir Med*. 2019;7(5):417-26. doi:10.1016/S2213-2600(18)30449-1  
8  
9  
10  
11  
12  
13  
14  
15  
16  
17  
18  
19  
20  
21  
22  
23  
24  
25  
26  
27  
28  
29  
30  
31  
32  
33  
34  
35  
36  
37  
38  
39  
40  
41  
42  
43  
44  
45  
46  
47  
48  
49  
50  
51  
52  
53  
54  
55  
56  
57  
58  
59  
60

For peer review only

### **Authors' contributions**

All authors helped with the design of this study and approved the final manuscript. DP, LMV and GD wrote the first draft of the study protocol and manuscript. NG was consulted for the statistical analysis plan for this study. LV helped designing the trial medication and advised on improving safety measures in relation to the trial medication. DB was consulted for the secondary outcomes on microbiota composition and AMR genes. AvR was consulted for the design of the study.

### **Funding statement**

This study was supported by the Elisabeth von Freyburg fonds, 'Stichting Kiddy Goodpills' and the Haga Teaching Hospital. Award/Grant number is not applicable.

### **Competing interests statement**

None declared.

### **Ethics approval**

This study has been approved by the Medical Research Ethics committee LDD (Leiden, The Netherlands) and is registered in the Netherlands National Trial Register (NTR) as Trial NL7044.



Supplementary file 1

**Monthly questionnaire for participants of the Approach study**

1. Did you consult a physician for your child because of a respiratory tract infection in the past month?

- Yes, the paediatrician of our own hospital
- Yes, the general practitioner
- Yes, the otolaryngologist
- Yes, another physician
- No

1b. If yes, how many times did your child visit a physician because of a respiratory tract infection in the past month?

2. Did you consult a physician for your child because of a stomach infection or gastro-enteritis in the past month?

- Yes, the paediatrician of our own hospital
- Yes, the general practitioner
- Yes, another physician
- No

2b. If yes, how many times did your child visit a physician because of a stomach infection or gastro-enteritis in the past month?

3. Did your child take any antibiotics in the past month?

- Yes, prescribed by the paediatrician of our own hospital
- Yes, prescribed by the general practitioner
- Yes, prescribed by the otolaryngologist
- Yes, prescribed by another physician
- No

*Question 4 and 5 are only applicable if question 3 is answered 'Yes'.*

4. How many antibiotic regimens did your child use in the past month?

*The (sub)questions of question 5 are asked for every antibiotic regimen separately.*

5a. For what infection was your child treated with antibiotics? (multiple choice)

- Rhinitis
- Otitis
- Tonsillitis
- Bronchitis or pulmonary infection
- Stomach infection or gastroenteritis
- Other infection (other than respiratory or gastro-intestinal infection)

5b. Which date did your child start with the antibiotic treatment?

DD/MM/YYYY

5c. Which date did your child stop with the antibiotic treatment?

DD/MM/YYYY

1  
2  
3  
4 5d. What is the name of the antibiotic regimen?  
5

6 6. Did your child get any vaccines in the past month? (multiple choice)  
7

- 8  No  
9  DKTP-Hib-HepB  
10  Pneumococcal  
11  MMR  
12  Meningococcal C  
13  Other vaccine  
14

15  
16 7. Has your child been admitted to the hospital because of an (suspected) infection in the past  
17 month?  
18

- 19  Yes  
20  No  
21

22 7b. If yes, for what infection was your child admitted to the hospital? (multiple choice)  
23

- 24  Rhinitis  
25  Otitis  
26  Throat infection / tonsillitis  
27  Bronchitis or pulmonary infection  
28  Stomach infection or gastroenteritis  
29  Other infection (other than respiratory or gastro-intestinal infection)  
30

31 7c. If yes, how many days has your child been admitted to the hospital in the past month?  
32

33 8. Did your child visit any form of day-care in the past month?  
34

- 35  Yes  
36  No  
37

38 8b. If yes, how many half days\* did your child visit day-care in the past month?  
39

40 8c. If yes, how many half days\* did your child miss from day-care because of an infection in the past  
41 month?  
42

43 \* A half day is a morning or an afternoon.  
44

45 9. Did you or your partner miss work due to your child having an infection during the past three  
46 months?  
47

- 48  Yes  
49  No  
50

51 9b. If yes, how many half days\* did you and your partner miss combined?  
52

53 \* A half day is a morning or an afternoon.  
54

55 10. Do you have any additional comments about the past month?  
56  
57  
58  
59  
60

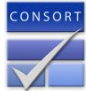

## CONSORT 2010 checklist of information to include when reporting a randomised trial\*

| Section/Topic                    | Item No | Checklist item                                                                                                                                                                              | Reported on page No |
|----------------------------------|---------|---------------------------------------------------------------------------------------------------------------------------------------------------------------------------------------------|---------------------|
| <b>Title and abstract</b>        |         |                                                                                                                                                                                             |                     |
|                                  | 1a      | Identification as a randomised trial in the title                                                                                                                                           | 1                   |
|                                  | 1b      | Structured summary of trial design, methods, results, and conclusions (for specific guidance see CONSORT for abstracts)                                                                     | 2                   |
| <b>Introduction</b>              |         |                                                                                                                                                                                             |                     |
| Background and objectives        | 2a      | Scientific background and explanation of rationale                                                                                                                                          | 4-5                 |
|                                  | 2b      | Specific objectives or hypotheses                                                                                                                                                           | 5-6                 |
| <b>Methods</b>                   |         |                                                                                                                                                                                             |                     |
| Trial design                     | 3a      | Description of trial design (such as parallel, factorial) including allocation ratio                                                                                                        | 6-7                 |
|                                  | 3b      | Important changes to methods after trial commencement (such as eligibility criteria), with reasons                                                                                          | NA                  |
| Participants                     | 4a      | Eligibility criteria for participants                                                                                                                                                       | 7 (table 1)         |
|                                  | 4b      | Settings and locations where the data were collected                                                                                                                                        | 7-8                 |
| Interventions                    | 5       | The interventions for each group with sufficient details to allow replication, including how and when they were actually administered                                                       | 6-8                 |
| Outcomes                         | 6a      | Completely defined pre-specified primary and secondary outcome measures, including how and when they were assessed                                                                          | 5-6                 |
|                                  | 6b      | Any changes to trial outcomes after the trial commenced, with reasons                                                                                                                       | NA                  |
| Sample size                      | 7a      | How sample size was determined                                                                                                                                                              | 9                   |
|                                  | 7b      | When applicable, explanation of any interim analyses and stopping guidelines                                                                                                                | NA                  |
| <b>Randomisation:</b>            |         |                                                                                                                                                                                             |                     |
| Sequence generation              | 8a      | Method used to generate the random allocation sequence                                                                                                                                      | 7                   |
|                                  | 8b      | Type of randomisation; details of any restriction (such as blocking and block size)                                                                                                         | 7                   |
| Allocation concealment mechanism | 9       | Mechanism used to implement the random allocation sequence (such as sequentially numbered containers), describing any steps taken to conceal the sequence until interventions were assigned | 7                   |
| Implementation                   | 10      | Who generated the random allocation sequence, who enrolled participants, and who assigned participants to interventions                                                                     | 7-8                 |
| Blinding                         | 11a     | If done, who was blinded after assignment to interventions (for example, participants, care providers, those                                                                                | 7                   |

|                                                      |     |                                                                                                                                                   |      |
|------------------------------------------------------|-----|---------------------------------------------------------------------------------------------------------------------------------------------------|------|
|                                                      |     | assessing outcomes) and how                                                                                                                       |      |
|                                                      | 11b | If relevant, description of the similarity of interventions                                                                                       | -    |
| Statistical methods                                  | 12a | Statistical methods used to compare groups for primary and secondary outcomes                                                                     | 9-11 |
|                                                      | 12b | Methods for additional analyses, such as subgroup analyses and adjusted analyses                                                                  | 9-11 |
| <b>Results</b>                                       |     |                                                                                                                                                   |      |
| Participant flow (a diagram is strongly recommended) | 13a | For each group, the numbers of participants who were randomly assigned, received intended treatment, and were analysed for the primary outcome    | NA   |
|                                                      | 13b | For each group, losses and exclusions after randomisation, together with reasons                                                                  | NA   |
| Recruitment                                          | 14a | Dates defining the periods of recruitment and follow-up                                                                                           | NA   |
|                                                      | 14b | Why the trial ended or was stopped                                                                                                                | NA   |
| Baseline data                                        | 15  | A table showing baseline demographic and clinical characteristics for each group                                                                  | NA   |
| Numbers analysed                                     | 16  | For each group, number of participants (denominator) included in each analysis and whether the analysis was by original assigned groups           | NA   |
| Outcomes and estimation                              | 17a | For each primary and secondary outcome, results for each group, and the estimated effect size and its precision (such as 95% confidence interval) | NA   |
|                                                      | 17b | For binary outcomes, presentation of both absolute and relative effect sizes is recommended                                                       | NA   |
| Ancillary analyses                                   | 18  | Results of any other analyses performed, including subgroup analyses and adjusted analyses, distinguishing pre-specified from exploratory         | NA   |
| Harms                                                | 19  | All important harms or unintended effects in each group (for specific guidance see CONSORT for harms)                                             | NA   |
| <b>Discussion</b>                                    |     |                                                                                                                                                   |      |
| Limitations                                          | 20  | Trial limitations, addressing sources of potential bias, imprecision, and, if relevant, multiplicity of analyses                                  | 1-2  |
| Generalisability                                     | 21  | Generalisability (external validity, applicability) of the trial findings                                                                         | -    |
| Interpretation                                       | 22  | Interpretation consistent with results, balancing benefits and harms, and considering other relevant evidence                                     | -    |
| <b>Other information</b>                             |     |                                                                                                                                                   |      |
| Registration                                         | 23  | Registration number and name of trial registry                                                                                                    | 1    |
| Protocol                                             | 24  | Where the full trial protocol can be accessed, if available                                                                                       | NA   |
| Funding                                              | 25  | Sources of funding and other support (such as supply of drugs), role of funders                                                                   | 15   |

\*We strongly recommend reading this statement in conjunction with the CONSORT 2010 Explanation and Elaboration for important clarifications on all the items. If relevant, we also recommend reading CONSORT extensions for cluster randomised trials, non-inferiority and equivalence trials, non-pharmacological treatments, herbal interventions, and pragmatic trials. Additional extensions are forthcoming: for those and for up to date references relevant to this checklist, see [www.consort-statement.org](http://www.consort-statement.org).

# BMJ Open

## Study protocol for a randomised controlled trial evaluating the clinical effects of antibiotic prophylaxis in children with recurrent respiratory tract infections: the APPROACH study

|                                 |                                                                                                                                                                                                                                                                                                                                                                                                                                                                                                                                                                                                                                                                                                                                                                                                                                                                                                                                                    |
|---------------------------------|----------------------------------------------------------------------------------------------------------------------------------------------------------------------------------------------------------------------------------------------------------------------------------------------------------------------------------------------------------------------------------------------------------------------------------------------------------------------------------------------------------------------------------------------------------------------------------------------------------------------------------------------------------------------------------------------------------------------------------------------------------------------------------------------------------------------------------------------------------------------------------------------------------------------------------------------------|
| Journal:                        | <i>BMJ Open</i>                                                                                                                                                                                                                                                                                                                                                                                                                                                                                                                                                                                                                                                                                                                                                                                                                                                                                                                                    |
| Manuscript ID                   | bmjopen-2020-044505.R2                                                                                                                                                                                                                                                                                                                                                                                                                                                                                                                                                                                                                                                                                                                                                                                                                                                                                                                             |
| Article Type:                   | Protocol                                                                                                                                                                                                                                                                                                                                                                                                                                                                                                                                                                                                                                                                                                                                                                                                                                                                                                                                           |
| Date Submitted by the Author:   | 24-May-2021                                                                                                                                                                                                                                                                                                                                                                                                                                                                                                                                                                                                                                                                                                                                                                                                                                                                                                                                        |
| Complete List of Authors:       | Peeters, Daphne; Haga Hospital Juliana Childrens Hospital, Department of paediatrics<br>van Geloven, Nan; Leiden University Medical Center, Department of Biomedical Data Sciences, Medical Statistics<br>Visser, Loes; Haga Teaching Hospital, Department of Hospital Pharmacy; Erasmus MC, Department of Hospital Pharmacy and Department of Epidemiology<br>Bogaert, Debby; University of Edinburgh, Center for Inflammation Research. Queen Medical Research Institute.; Wilhelmina Children's Hospital University Medical Centre, Department of Paediatric Infectious Diseases and Immunology<br>van Rossum, AM; Erasmus MC Sophia, Department of paediatrics<br>Driessen, Gertjan; Haga Hospital Juliana Childrens Hospital, Department of paediatrics; Maastricht UMC+, Department of paediatrics<br>Verhagen, Lilly; Wilhelmina Children's Hospital University Medical Centre, Department of Paediatric Infectious Diseases and Immunology |
| <b>Primary Subject Heading</b>: | Paediatrics                                                                                                                                                                                                                                                                                                                                                                                                                                                                                                                                                                                                                                                                                                                                                                                                                                                                                                                                        |
| Secondary Subject Heading:      | Infectious diseases, Evidence based practice, Pharmacology and therapeutics, Research methods                                                                                                                                                                                                                                                                                                                                                                                                                                                                                                                                                                                                                                                                                                                                                                                                                                                      |
| Keywords:                       | PAEDIATRICS, Paediatric infectious disease & immunisation < PAEDIATRICS, Clinical trials < THERAPEUTICS, Respiratory infections < THORACIC MEDICINE                                                                                                                                                                                                                                                                                                                                                                                                                                                                                                                                                                                                                                                                                                                                                                                                |
|                                 |                                                                                                                                                                                                                                                                                                                                                                                                                                                                                                                                                                                                                                                                                                                                                                                                                                                                                                                                                    |

SCHOLARONE™  
Manuscripts



I, the Submitting Author has the right to grant and does grant on behalf of all authors of the Work (as defined in the below author licence), an exclusive licence and/or a non-exclusive licence for contributions from authors who are: i) UK Crown employees; ii) where BMJ has agreed a CC-BY licence shall apply, and/or iii) in accordance with the terms applicable for US Federal Government officers or employees acting as part of their official duties; on a worldwide, perpetual, irrevocable, royalty-free basis to BMJ Publishing Group Ltd ("BMJ") its licensees and where the relevant Journal is co-owned by BMJ to the co-owners of the Journal, to publish the Work in this journal and any other BMJ products and to exploit all rights, as set out in our [licence](#).

The Submitting Author accepts and understands that any supply made under these terms is made by BMJ to the Submitting Author unless you are acting as an employee on behalf of your employer or a postgraduate student of an affiliated institution which is paying any applicable article publishing charge ("APC") for Open Access articles. Where the Submitting Author wishes to make the Work available on an Open Access basis (and intends to pay the relevant APC), the terms of reuse of such Open Access shall be governed by a Creative Commons licence – details of these licences and which [Creative Commons](#) licence will apply to this Work are set out in our licence referred to above.

Other than as permitted in any relevant BMJ Author's Self Archiving Policies, I confirm this Work has not been accepted for publication elsewhere, is not being considered for publication elsewhere and does not duplicate material already published. I confirm all authors consent to publication of this Work and authorise the granting of this licence.

1  
2  
3 **Study protocol for a randomised controlled trial evaluating the clinical effects of antibiotic**  
4 **prophylaxis in children with recurrent respiratory tract infections: the APPROACH study**  
5  
6

7 *Trial acronym: APPROaCH study (Antibiotic ProPhylaxis for recurrent RespiratOry infections in*  
8 *CHildren).*  
9

10  
11 Mrs. Daphne Peeters, MD.

12 Department of paediatrics, Juliana Children's Hospital, The Hague, The Netherlands.

13 [D.peeters@hagaziekenhuis.nl](mailto:D.peeters@hagaziekenhuis.nl) <https://orcid.org/0000-0002-3110-9434>  
14  
15

16  
17 Dr. Nan van Geloven, PhD.

18 Department of Biomedical Data Sciences, Medical Statistics, Leiden University Medical Center,  
19 Leiden, The Netherlands. [N.van\\_Geloven@lumc.nl](mailto:N.van_Geloven@lumc.nl) <https://orcid.org/0000-0002-5600-9093>  
20  
21

22  
23 Dr. Loes E. Visser, PharmD, PhD.

24 1. Department of Hospital Pharmacy, Haga Teaching Hospital, The Hague, The Netherlands.

25 [l.e.visser@hagaziekenhuis.nl](mailto:l.e.visser@hagaziekenhuis.nl) <https://orcid.org/0000-0002-1421-6246>  
26

27 2. Department of Hospital Pharmacy, Erasmus MC, Rotterdam, The Netherlands  
28

29 3. Department of Epidemiology, Erasmus MC, Rotterdam, The Netherlands  
30

31  
32 Prof. Debby Bogaert, MD, PhD.

33 1. Center for Inflammation Research. Queen Medical Research Institute. University of Edinburgh, UK.

34 [D.Bogaert@ed.ac.uk](mailto:D.Bogaert@ed.ac.uk) <https://orcid.org/0000-0003-2651-7000>  
35

36 2. Department of Paediatric Infectious Diseases and Immunology, University Medical Center Utrecht,  
37 Utrecht, The Netherlands.  
38

39  
40  
41 Prof. Annemarie M.C. van Rossum, MD, PhD.

42 Department of paediatrics, Erasmus MC-Sophia, Rotterdam, The Netherlands.

43 [a.vanrossum@erasmusmc.nl](mailto:a.vanrossum@erasmusmc.nl) . <https://orcid.org/0000-0002-1259-477X>  
44  
45

46  
47 Prof. Dr. Gertjan J.A. Driessen\*, MD, PhD.

48 1. Department of paediatrics, Juliana Children's Hospital, The Hague, The Netherlands.

49 [G.driessen@hagaziekenhuis.nl](mailto:G.driessen@hagaziekenhuis.nl) <https://orcid.org/0000-0002-4566-9547>  
50

51 2. Department of Paediatrics, Maastricht University Medical Center+ (MUMC+), Maastricht, the  
52 Netherlands  
53

54  
55 Dr. Lilly M. Verhagen\*\*, MD, M.H.Sc. Epidemiologist, PhD.

56 Department of Paediatric Infectious Diseases and Immunology, Wilhelmina Children's Hospital,

57 Lundlaan 6, 3584 EA Utrecht, The Netherlands. [L.M.Verhagen-3@umcutrecht.nl](mailto:L.M.Verhagen-3@umcutrecht.nl)  
58

59 <https://orcid.org/0000-0002-3451-9201>  
60

1  
2  
3  
4 \*These authors contributed equally

5  
6 # Corresponding author

7  
8  
9 Word count: 3469 (excl. title page, abstract, references and tables)

## 10 **ABSTRACT**

### 11 **Introduction**

12  
13  
14  
15 Respiratory tract infections (RTIs) affect children all over the world and are associated with significant  
16 morbidity and mortality. In particular recurrent RTIs cause a high burden of disease and lead to  
17 frequent doctor visits. Children with recurrent RTIs generally have no significant alterations or deficits  
18 in systemic immunity. In an attempt to treat the assumed bacterial component involved, they are often  
19 treated with prolonged courses of prophylactic antibiotics taken on a daily basis. Despite its common  
20 use, there is no evidence that this is beneficial. Studies assessing the clinical effectiveness of  
21 antibiotic prophylaxis as well as potential adverse effects and antibiotic resistance development, are  
22 therefore urgently needed.

### 23 **Methods and analysis**

24  
25  
26  
27  
28 We present a protocol for a randomized double-blind placebo-controlled trial comparing co-trimoxazole  
29 with placebo treatment in children with recurrent RTIs. A total of 158 children (aged six months – ten  
30 years) with recurrent RTIs without significant comorbidity will be enrolled from a minimum of 10 Dutch  
31 hospitals. One group receives co-trimoxazole 18mg/kg twice daily (36mg/kg/day) and the other group  
32 receives a placebo twice daily for a period of three months. The main objective is to determine  
33 whether antibiotic prophylaxis is more effective than placebo to prevent/reduce respiratory symptoms  
34 in children with recurrent RTIs. Respiratory symptoms will be scored by parents on a daily basis in  
35 both study arms by use of a mobile phone application. Our primary outcome will be the number of  
36 days with at least two respiratory symptoms during treatment.

### 37 **Ethics and dissemination**

38  
39  
40  
41  
42  
43  
44  
45  
46  
47  
48  
49  
50  
51  
52  
53  
54  
55  
56  
57  
58  
59  
60  
Ethics approval was obtained from the Medical Ethics Research Committee Zuidwest Holland/LDD. A  
manuscript with the study results will be submitted to a peer-reviewed journal. All participants will be  
informed about the study results. The results of the study will inform clinical guidelines regarding the  
treatment of children with recurrent RTIs.

### 59 **Trial registration number**

60  
NL7044 (NTR); Pre-results.



## STRENGTHS AND LIMITATIONS OF THIS STUDY

- Apart from studies focusing exclusively on otitis media, this is the first randomized controlled trial that examines whether co-trimoxazole prophylaxis is effective for recurrent respiratory tract infections (RTIs) in children.
- We will examine the clinical response to prophylactic antibiotic treatment not only during the period in which treatment is taken but also in the three months following that period, because of an extended follow-up duration of six months in total.
- We will examine predictors of treatment effect, such as clinical characteristics, microbiota parameters, and immunological characteristics.
- All children receive the same dose per kg bodyweight of co-trimoxazole and this study does not measure pharmacokinetic parameters. Therefore, we won't be able to determine the most optimal dosage of co-trimoxazol when prescribed for a prophylactic indication in children with recurrent RTIs.
- We will not enrol children with underlying chronic illnesses, such as cardiorespiratory or neuromuscular conditions, immune deficiency and congenital abnormalities, so the results of our study cannot be extrapolated to these groups of patients.

Keywords: PAEDIATRICS, paediatric infectious disease & immunisation, Clinical trials, Respiratory infections

## INTRODUCTION

### Lack of evidence-based guidelines for a common clinical problem

Young children (up to two years of age) experience symptoms of a respiratory tract infection (RTI) for a median of 44 days per year. The median number of infectious episodes is almost double in children with recurrent RTIs when compared to healthy peers.[1] Even in the absence of high-risk conditions such as major immune deficiencies or congenital malformations, some children develop many more RTIs than their peers.[2] Recurrent RTIs in children are among the leading reasons for primary care consultations and for referral to paediatricians and ear, nose and throat (ENT) specialists.[3] In developed countries, recurrent RTIs, defined as a minimum of six to eight episodes per year, affect 15-20% of children under five years of age.[4] Most children suffer from recurrent RTIs of the upper airways, but in approximately 10-30% the lower respiratory tract is also affected.[5] Compared to their healthy peers, children with recurrent RTIs often visit the outpatient clinic and they more often need hospitalization. In addition, these children are treated more frequently with medication, e.g. inhaled bronchodilators and corticosteroids as well as antibiotics.[1] The high disease burden can also lead to failure to thrive and developmental delays in children, as well as parental productivity losses associated with children's illness and absenteeism from work, leading to high costs for the community.[1, 6, 7] Lower RTIs in childhood can also lead to pulmonary sequelae such as bronchiectasis and irreversible lung damage [8-10], putting children with recurrent RTIs even more at risk for long-term damage. In our experience, children who visit the outpatient clinics because of recurrent RTIs are generally <10 years of age and most are treated on a 'trial and error' base because there is no international consensus about the best treatment for children with recurrent RTIs. Previous studies suggest that antibiotic prophylaxis, treatment with the immunomodulator OM-85, active immunization and/or parental education on risk factors (passive smoking) may be at least of some benefit.[4, 11-14] In general, antibiotics are frequently used for the treatment of acute RTIs in children. In an attempt to treat the assumed bacterial component involved in recurrent RTIs, prolonged antibiotic regimens are often prescribed. Previous studies in children with recurrent acute otitis media (AOM) showed that antibiotic prophylaxis prevented one and a half episode for every 12 months of treatment per child.[15] Studies that examined the clinical effectiveness of antibiotic prophylaxis in children suffering from recurrent RTIs are scarce and mainly focus on high risk groups with recurrent lower RTIs.[11, 16-21] No studies have been performed on clinical effectiveness of antibiotic prophylaxis in otherwise healthy children who suffer from recurrent RTIs.

The antibiotic regimen that is most commonly prescribed in children with recurrent RTIs is trimethoprim/sulfamethoxazole (co-trimoxazole). Both trimethoprim and sulfamethoxazole are bacteriostatic if used alone. Combining trimethoprim and sulfamethoxazole elicits a synergistic effect and makes the antibiotic regimen bactericidal. Co-trimoxazole is a fixed antibiotic combination of trimethoprim and sulfamethoxazole (1:5) which covers most Gram-positive and Gram-negative potential pathogens as well as *Pneumocystis jiroveci*. In addition, several studies suggest that co-trimoxazole has an immunomodulatory effect which could enhance the immune response.[22-25] The

1  
2  
3 combination of antimicrobial and immunomodulatory properties could provide an additional beneficial  
4 effect in the prevention or reduction of RTIs.  
5

6  
7 In this study we will compare the clinical effectiveness of co-trimoxazole prophylaxis with placebo in  
8 children with recurrent RTIs.  
9

## 10 **Role of microbiota in respiratory infection and disease**

11  
12 Prolonged antibiotic treatment is of major concern, since antimicrobial resistance (AMR) development  
13 increases with duration of the antimicrobial course.[26] Probably the most important route of AMR  
14 gene selection in humans is antibiotic-induced changes to our protective microbial communities, also  
15 called the microbiota.[27] Whereas microbial disturbances elicited by antibiotic treatment in adults are  
16 mostly temporary, exposure to antibiotic treatment early in life may have a lasting impact on the  
17 composition of the microbiota leading to permanent replacement by resistant organisms.[28, 29] While  
18 the microbiota of the gastro-intestinal tract has been studied most extensively[30, 31], the human  
19 nasopharynx is considered the niche from which both upper and lower RTIs originate and resistance  
20 can also emerge in commensals or pathogens colonizing this body site.[32] During the past decade,  
21 high-throughput pipelines have become available to also characterize the complete nasopharyngeal  
22 microbiota.[33]  
23

24  
25 In this study we will examine short-term and long-term effects of co-trimoxazole prophylaxis on the  
26 microbiota composition and antibiotic resistance in children who suffer from recurrent RTIs.  
27  
28

## 29 **METHODS AND ANALYSIS**

### 30 **Objectives and study parameters**

31  
32 Primarily, we aim to investigate the clinical efficacy of co-trimoxazole prophylaxis in Dutch children  
33 (aged six months up to ten years) with recurrent RTIs. Children will be randomized to co-trimoxazole  
34 or placebo for a treatment period of three months, since this is the treatment period after which a  
35 beneficial effect was achieved in children with recurrent acute or chronic suppurative otitis media.[15]  
36

#### 37 *Primary objective*

38 To determine whether three months of prophylactic treatment with co-trimoxazole causes a reduction  
39 in the number of days a child experiences at least two RTI symptoms in children aged 6 months to  $\leq 10$   
40 years with recurrent RTIs, when compared to placebo.  
41  
42

#### 43 *Secondary Objectives*

44 1. To determine whether co-trimoxazole prophylactic therapy reduces:

- 45 - Time to resolution of symptoms;
  - 46 - The severity of symptoms defined by the number and type of different infectious symptoms;
  - 47 - Use of analgesics / antipyretics;
- 48  
49  
50  
51  
52  
53  
54  
55  
56  
57  
58  
59  
60

- 1
- 2
- 3 - Use of antibiotic treatment courses;
- 4 - Absenteeism from day care or school and/or parental absenteeism from work;
- 5 - Alterations in nutritional status.
- 6
- 7
- 8
- 9 2. To examine predictors (e.g. demographic, environmental, family history, mucosal, microbiological
- 10 and immunological characteristics) for the (absence of) prophylactic treatment effect
- 11
- 12
- 13 3. To examine whether cessation of antibiotic prophylactic treatment affects the presence of RTI
- 14 symptoms and how this correlates with clinical, microbiological and immunological characteristics of
- 15 the patients.
- 16
- 17
- 18
- 19 4. To record and evaluate adverse events:
- 20 - The occurrence of mild adverse effects as described in the Summary of Product
- 21 Characteristics (SPC), such as skin rash, gastro-intestinal complaints, pruritus or mild
- 22 headache;
- 23 - The occurrence of severe adverse reactions.
- 24
- 25
- 26
- 27 5. To examine short-term and long-term effects of co-trimoxazole prophylaxis on microbiota deviation,
- 28 AMR and (mucosal and systemic) immunological outcomes.
- 29
- 30
- 31

### 32 **Study design**

34 We will conduct a randomized placebo-controlled double-blind clinical trial in which we compare co-  
35 trimoxazole with a placebo in 158 children with recurrent upper and/or lower RTIs. The inclusion and  
36 exclusion criteria are listed in table 1. We will enrol children aged six months up to ten years. Children  
37 younger than six months won't participate in this study, because at this age the presence of recurrent  
38 RTIs cannot be established yet. For age-specific definitions of recurrent RTIs, we took the twofold  
39 standard deviation of the mean number of upper RTIs per year in a cohort of 1314 German children,  
40 except for children aged 5-10 years, in whom we used the same definition as younger children (2-5  
41 years). This means that we define recurrent RTIs as at least 11 parental-reported upper RTIs for  
42 children younger than two years and eight parental-reported upper RTIs for children aged two to ten  
43 years per year.[34] Recurrent lower RTIs (i.e. pneumonia, bronchopneumonia or acute bronchitis) are  
44 defined as at least two episodes per year or three or more episodes during the child's life regardless of  
45 age. These definitions of recurrent upper and lower RTIs were also used in the Dutch national  
46 guideline for diagnostic strategies in children with recurrent RTIs.[35] If an underlying immune  
47 deficiency or contra-indication for co-trimoxazole [36] hasn't been ruled out yet, these will be tested in  
48 the blood sample taken in all participants before randomization. Children will be randomized to one of  
49 two oral suspension regimens for three months: co-trimoxazole 36 mg/kg/day (2 x 18 mg/kg) or  
50 placebo twice daily. The dose of co-trimoxazole is in accordance with the therapeutic dose (for acute  
51 infections) as described in the Dutch paediatric drug formulary. Doses and duration of treatment are  
52  
53  
54  
55  
56  
57  
58  
59  
60

also based on studies of antibiotic prophylaxis in paediatric populations with recurrent acute or chronic suppurative otitis media.[15] In case of a new RTI episode occurring during follow-up for which the child has a clinical indication to receive (additional) antibiotic treatment, the child will receive antibiotics that conform to national guidelines and the study medication will be discontinued for the duration of this antibiotic treatment. Medication compliance will be measured in two ways. During the T3 visit to the hospital, parents will be asked to bring the bottles of trial medication and to answer questions about compliance. By doing so, we will be able to compare the self-reported compliance with the number of empty and (partly) full bottles that have been returned.

Table 1. Inclusion and exclusion criteria

|                    |                                                                                                                                                                                                                                                                                                                                                                                                                                                                                                                                                                                                                                                                                                                                                                                                                     |
|--------------------|---------------------------------------------------------------------------------------------------------------------------------------------------------------------------------------------------------------------------------------------------------------------------------------------------------------------------------------------------------------------------------------------------------------------------------------------------------------------------------------------------------------------------------------------------------------------------------------------------------------------------------------------------------------------------------------------------------------------------------------------------------------------------------------------------------------------|
| Inclusion criteria | <ul style="list-style-type: none"> <li>- Presenting to one of the participating clinics;</li> <li>- Age 6 months – 10 years;</li> <li>- Suffering from recurrent respiratory tract infections (RTIs)*;</li> <li>- Informed consent from parent(s)/caregiver(s) with legal custody.</li> </ul>                                                                                                                                                                                                                                                                                                                                                                                                                                                                                                                       |
| Exclusion criteria | <ul style="list-style-type: none"> <li>- Current prophylactic antibiotic use or prophylactic antibiotic use during the previous month;</li> <li>- Underlying immune deficiency other than for IgA or IgG subclasses;</li> <li>- Congenital abnormalities (including but not limited to cleft palate, neuromuscular or cardiac disorders and syndromes);</li> <li>- Suffering from chronic respiratory disease, such as cystic fibrosis (CF), primary ciliary dyskinesia (PCD) or anatomical abnormalities;</li> <li>- Only experiencing recurrent AOM or chronic suppurative otitis media without other recurrent RTIs;</li> <li>- Known allergy to co-trimoxazole;</li> <li>- Known contra-indication for co-trimoxazole, e.g. liver failure or impaired kidney function and/or haematologic disorders.</li> </ul> |

\* Recurrent upper RTIs: for children aged <2 years yearly at least 11 and for children aged 2-10 years yearly at least 8 parental-reported upper RTIs including, but not limited to, otitis media. Recurrent lower RTIs (i.e. pneumonia, bronchopneumonia or acute bronchitis) are defined as at least 2 episodes per year or 3 or more episodes during the child's life regardless of age.[34, 35]

### Randomization

The randomization procedures are performed by a member of the trial pharmacy. Randomization is computer-generated and subjects will be allocated in a 1:1 ratio with random block sizes of two, four or six subjects to prevent predictability of the allocation. Study medication is blinded for the subjects, his/her parent(s), physicians, the monitor and the study team. Only the members of the trial pharmacy have access to information on the allocation for each subject, because they are responsible for the preparation and delivery of the study medication, and for emergency de-blinding, if needed.

### Measurements

The schedule of study enrolment, interventions and measurements of endpoints is shown in table 2. For the parent-reported occurrence of symptoms of RTIs, a mobile application will be used. Previous studies used paper diaries to detect parent-reported symptoms. These are prone to non-compliance and hamper real-time detection of disease occurrence. The use of this Diary-App for symptom recording costs parents less than one minute per day and has shown to improve case-finding and questionnaire completeness from 60% to  $\geq 90\%$ .<sup>[37]</sup> Also, parents will be asked to answer extra questions once a month. These include questions about the use of other antibiotics (see online supplementary file 1 for the monthly questionnaire).

At inclusion and after one, three and six months ( $\pm$  two weeks for each sample point) non-invasive respiratory (nasopharyngeal swab and saliva) and faecal samples for microbiota composition, immunologic analysis and AMR gene detection will be collected. Also, these samples could be used for viral analysis. In addition, mucosal lining fluid will be collected at two time points in at least 50 subjects. Before inclusion, blood samples will be taken to test for possible contra-indications (e.g. kidney and/or liver dysfunction). After treatment we will also collect blood samples to monitor for possible kidney, liver and haematological side effects of co-trimoxazole use. Extra blood samples will be collected for additional immunological analyses at both time points. Before the start of treatment parents will be asked to fill in a questionnaire. The study will be started in a minimum of 10 hospitals in the Netherlands. Inclusion will take place during both the winter and summer period to account for seasonal differences in microbiota composition in our analyses. If necessary, the number of study locations can be extended during the study, depending on the speed of subject enrolment.

Table 2. Schedule of enrolment, intervention, and measurement of outcomes

|                                       | Enrolment |       | Post-allocation |       |       |       |       |       |
|---------------------------------------|-----------|-------|-----------------|-------|-------|-------|-------|-------|
| <b>TIMEPOINT</b>                      | $t_0$     | $t_r$ | $t_1$           | $t_2$ | $t_3$ | $t_4$ | $t_5$ | $t_6$ |
| <b>ENROLMENT</b>                      | X         |       |                 |       |       |       |       |       |
| Eligibility screen                    | X         |       |                 |       |       |       |       |       |
| Informed consent                      | X         |       |                 |       |       |       |       |       |
| Screening for exclusion criteria      | X         |       |                 |       |       |       |       |       |
| Randomization                         |           | X     |                 |       |       |       |       |       |
| <b>INTERVENTION</b>                   |           |       |                 |       |       |       |       |       |
| Co-trimoxazol or placebo              |           |       | ←————→          |       |       |       |       |       |
| <b>MEASUREMENTS</b>                   |           |       |                 |       |       |       |       |       |
| Baseline questionnaire                | X         |       |                 |       |       |       |       |       |
| Digital diary InfectionApp            |           |       | ←————→          |       |       |       |       |       |
| Questionnaire on infectious episodes  |           |       | X               | X     | X     | X     | X     | X     |
| Physical examination                  | X         |       |                 |       | X     |       |       | X     |
| Blood sample                          | X         |       |                 |       | X     |       |       |       |
| Nasopharynx, saliva and faecal sample | X         |       | X               |       | X     |       |       | X     |

|                              |   |  |   |  |     |  |  |     |
|------------------------------|---|--|---|--|-----|--|--|-----|
| Mucosal lining fluid sample* | X |  | X |  | (X) |  |  | (X) |
|------------------------------|---|--|---|--|-----|--|--|-----|

\*Sampling at 2/4 time points, preferably T0 and T1.

## Sample size

We assumed 90% compliance with symptom monitoring via the app, i.e. app data available for  $0.90 \times 3$  months (90 days) = 81 days per participant. There is limited literature available about the number of days with RTI symptoms per time period in children with recurrent RTIs. Toivonen et al. published a large prospective cohort study from Finland including 1089 children followed up from birth to two years of age for respiratory infections by a daily symptom diary.[1] In this study, children with recurrent RTIs (defined as number of days with symptoms >90% percentile limit) had a median of 31 days per 100 days with at least one respiratory symptom. In a pilot study performed in the winter season in one of the participating centres (UMC Utrecht) including 18 children with recurrent RTIs we observed a median of 76 days with at least one respiratory symptom and a median of 42 days with at least two respiratory symptoms per 100 days (this would be 34 per 81 days). We estimated that the median number of days with at least two symptoms in the Finnish study would be  $(42/76) \times 31 = 17$  days per 100 = 14 days per 81 days. Following, we took the average of the Finnish study and our own study to end up with an estimated median number of symptomatic days of  $(14+34)/2 = 24$  days per 81 days in the placebo group.

The IQR in the Finnish study was 104 - 136, translating into a SD of 23.7, which was comparable to the SD in our pilot study (20.5); as such we took the SD of our study for our sample size calculation since the period in which symptoms were measured in the pilot study (mean 115 days) better reflected the follow-up period of the trial (90 days) than the period in which symptoms were measured in the Toivonen study (at least one year).

Assuming 24 days with at least two RTI symptoms in the placebo group and taking our aim to detect a clinically meaningful 40% reduction (i.e. a reduction of  $0.40 \times 24 = 10$  days with RTI symptoms) in the antibiotic treatment arm, we need to include 71 children per arm, so a total number of  $71 \times 2 = 142$  children, according to the Wilcoxon-Mann-Whitney test for two groups (two-tailed) with alpha 0.05 and power 80%. Including a dropout rate of 10%, this brings us to a number of  $71 / 0.9 = 79$  children per arm, so a total number of 158 children.

## Outcomes and data analysis

Table 2 summarizes the assessment and sampling schedule.

### Assessment of RTI symptoms

Descriptive statistics for demographic and clinical characteristics for both treatment allocation groups will be described. These include but are not limited to age, height, weight, ethnicity, co-morbidity,

1  
2  
3 previous ENT-interventions, use of medication, the number of RTI episodes before inclusion, the  
4 severity of the infections (e.g. hospital admissions), and type of RTI (e.g. bronchiolitis, otitis,  
5 pneumonia). Also, we will examine the frequency distribution of risk factors for the development of  
6 RTIs, which include for example smoking in the household, number of siblings and daycare  
7 attendance.  
8  
9

10  
11 Analyses will be performed on the basis of the 'intention-to-treat principle', comparing the treatment  
12 arm with the placebo arm, defining the treatment group based on the treatment allocation. In the  
13 intention-to-treat analysis every randomized subject will be included according to treatment  
14 assignment, thus ignoring potential non-adherence, protocol deviations, withdrawal, and anything that  
15 happens after randomization, therefore maintaining prognostic balance generated from the original  
16 random treatment allocation. The analyses will only include subjects of whom at least 80% of the  
17 symptom diary data is available. An inventory of missing data will be made and if over 5% of 142  
18 subjects have less available data than 80% of the symptom diary days, an imputation strategy will be  
19 used. We will also conduct a 'per-protocol analysis' in which we will only include the days that patients  
20 adhered to the protocolled treatment allocation. R and IBM SPSS Statistics will be used for statistical  
21 analyses.[38]  
22  
23  
24  
25  
26  
27

28 For our primary objective, we will compare the number of days with at least two RTI symptoms during  
29 90 days of receiving antibiotic treatment / placebo. Since the actual number of monitored days may  
30 vary per patient, we will analyse the incidence rate (number of days with at least two 2 RTI symptoms  
31 divided by the total number of days monitored). We will use a negative binomial regression analysis  
32 with outcome the number of days with at least two respiratory symptoms and use the number of days  
33 monitored as offset. Our target parameter is the incidence rate ratio for treatment. We will include main  
34 effects of strong predictors of RTI symptoms in the model.  
35  
36  
37  
38

39 To determine which set of available determinants predicts heterogeneity of treatment effect, we will  
40 first develop a prediction model including well-known risk factors for the development of RTI  
41 complaints in children. These include for example age of the child, smoke exposure in the household,  
42 day-care attendance and number of siblings. In this prediction model, we will adjust for treatment  
43 allocation.[39] From this model, a summary score will be derived that is used as a risk score in the  
44 final model. The interaction between this risk score and the treatment allocation will be added as a  
45 covariate in a model for the primary outcome to investigate to what extent these host factors affect the  
46 effect of treatment on our primary outcome.  
47  
48  
49  
50  
51

52 As a secondary analysis, we will also perform a negative binomial regression analysis with number of  
53 days with at least two RTI symptoms as the dependent variable and number of monitored days as  
54 offset, during the total 0-6 month period in order to assess the outcome both during and after  
55 cessation of co-trimoxazole versus placebo. In addition, we will also apply a mixed effect model to  
56 estimate whether the pattern of RTI symptoms over time changes according to treatment allocation.  
57  
58  
59  
60



## Respiratory and gut microbiota

For the secondary objective to detect shifts in microbiota composition in the group that received antibiotic prophylaxis compared to the placebo group, we will collect nasopharyngeal swabs (paediatric Copan e-swab with flocced nylon tip) and faecal samples from which bacterial DNA will be extracted according to previously validated methods. Swabs and faecal samples are frozen at -80°C until further analyses. Metagenomic sequencing will be conducted in order to identify the microbiota composition and AMR genes of the faecal samples. For nasopharyngeal samples, 16S-based sequencing will be used to examine the microbiota composition.[30, 40]

## Saliva, blood and mucosal lining fluid samples

Blood samples (peripheral blood mononuclear cells and plasma), saliva samples and mucosal lining fluid will be collected at pre-determined intervals (Table 2) for immunological analyses aimed at the identification of markers associated with clinical outcome. Techniques include flow cytometry, proteomics, proliferative studies, cytokine release assays and RNA expression profiling. Saliva samples will also be used for the determination of antimicrobial peptides, inflammatory cytokines, proteomics and mucosal antibodies. Mucosal lining fluid will be used to measure (protein) immune markers such as antibodies, chemokines and cytokines.

## Data management

Clinical data will be collected from the Electronic Medical Record by the research staff. All research data will be stored in the data management program Castor EDC. The handling of personal data will comply with the Dutch General Data Protection Regulation (in Dutch: Algemene Verordening Gegevensbescherming (AVG)). Data will be handled confidentially. The research team has access to coded data. To be able to trace data to an individual subject, a subject identification code list will be used to link the research data to the subject, which will be safeguarded by the local investigators and the trial pharmacy. This trial is monitored in accordance with the Good Clinical Practice guidelines.

## PATIENT AND PUBLIC INVOLVEMENT

Because we are supported by two patient involvement groups, we feel confident that not only physicians but also patients will be open to our study results. The patient involvement groups were actively involved in the development of our study protocol. During the yearly conference day of the Foundation for Primary Immune Deficiencies ('Stichting voor Afweerstoornissen'), one of our group members (L.M. Verhagen) has discussed the use of antibiotic prophylactic treatment for mild immune deficiencies in children with patients and parents. Many patients and parents expressed their worries about prolonged antibiotic use, mainly related to its adverse effects and the possibility of future infections with resistant bacteria that can no longer be treated with antibiotics. Following this

1  
2  
3 discussion, we started discussion sessions with small groups of parents of children visiting the airway  
4 clinic in the Wilhelmina Children's Hospital, UMC Utrecht, at several time points. The results showed  
5 that parents felt that more research was needed to determine whether antibiotic prophylaxis is an  
6 effective treatment. The involvement of both patient groups facilitates acceptance and implementation  
7 of our study results in the patient community. We will provide these patient support groups with our  
8 study results by publication of the outcomes in 'Paraplu', the monthly journal of the Foundation for  
9 Primary Immune Deficiencies, and by discussion of the results during meetings of the patient support  
10 groups. Also, we will send a half-yearly newsletter and an information bulletin containing the final  
11 results to the study participants.  
12  
13  
14  
15

## 16 **ETHICS AND DISSEMINATION**

17  
18  
19 This study will be conducted according to the principles of the Declaration of Helsinki (2013, Brazil,  
20 version 64) and in accordance with the *Research Involving Human Subjects Act (WMO)*. The Medical  
21 Research Ethics committee Zuidwest Holland / LDD (The Hague / Leiden, The Netherlands) has  
22 approved the study protocol. Approval of the local board of each trial site will be obtained before  
23 enrolment of the first subject in that specific hospital. This study is registered in The Netherlands  
24 National Trial Register (NTR) as Trial NL7044. After completion of this study, results will be submitted  
25 to a peer-reviewed journal.  
26  
27  
28  
29  
30  
31

## 32 **CURRENT TRIAL STATUS**

33  
34 The first subject was enrolled in January 2019. All the local boards of the first 10 trial sites have given  
35 their approval to start enrolling patients in this study, the latest approval was obtained in February  
36 2020. If enrolment is slower than expected, a request for the addition of extra trial sites will be  
37 submitted to the Medical Research Ethics committee.  
38  
39  
40  
41  
42  
43  
44  
45  
46  
47  
48  
49  
50  
51  
52  
53  
54  
55  
56  
57  
58  
59  
60

## REFERENCES

1. Toivonen L, Karppinen S, Schuez-Havupalo L, et al. Burden of Recurrent Respiratory Tract Infections in Children: A Prospective Cohort Study. *Pediatr Infect Dis J*. 2016;35(12):e362-e9. doi:10.1097/INF.0000000000001304
2. Ball TM, Holberg CJ, Aldous MB, et al. Influence of attendance at day care on the common cold from birth through 13 years of age. *Arch Pediatr Adolesc Med*. 2002;156(2):121-6.
3. Otters HB, van der Wouden JC, Schellevis FG, et al. Changing morbidity patterns in children in Dutch general practice: 1987-2001. *Eur J Gen Pract*. 2005;11(1):17-22. doi:10.3109/13814780509178011
4. Schaad UB, Esposito S, Razi CH. Diagnosis and Management of Recurrent Respiratory Tract Infections in Children: A Practical Guide. *Arch Pediatr Infect Dis*. 2016;4(1):e31039. doi:10.5812/pedinflect.31039
5. Couriel J. Assessment of the child with recurrent chest infections. *Br Med Bull*. 2002;61:115-32.
6. Murray MT, Heitkemper E, Jackson O, et al. Direct costs of acute respiratory infections in a pediatric long-term care facility. *Influenza Other Respir Viruses*. 2016;10(1):34-6. doi:10.1111/irv.12350
7. Enserink R, Lugner A, Suijkerbuijk A, et al. Gastrointestinal and respiratory illness in children that do and do not attend child day care centers: a cost-of-illness study. *PLoS One*. 2014;9(8):e104940. doi:10.1371/journal.pone.0104940
8. Edmond K, Scott S, Korczak V, et al. Long term sequelae from childhood pneumonia; systematic review and meta-analysis. *PLoS One*. 2012;7(2):e31239. doi:10.1371/journal.pone.0031239
9. Brower KS, Del Vecchio MT, Aronoff SC. The etiologies of non-CF bronchiectasis in childhood: a systematic review of 989 subjects. *BMC Pediatr*. 2014;14:4. doi:10.1186/s12887-014-0299-y
10. Thomson C, Myer L, Zar HJ. The Impact of Pneumonia on Development of Chronic Respiratory Illness in Childhood. *Pediatric Allergy, Immunology, and Pulmonology*. Volume: 23 Issue 4 2011; 279-290.
11. Onakpoya IJ, Hayward G, Heneghan CJ. Antibiotics for preventing lower respiratory tract infections in high-risk children aged 12 years and under. *Cochrane Database Syst Rev*. 2015(9):CD011530. doi:10.1002/14651858.CD011530.pub2
12. Esposito S, Bianchini S, Bosis S, et al. A randomized, placebo-controlled, double-blinded, single-centre, phase IV trial to assess the efficacy and safety of OM-85 in children suffering from recurrent respiratory tract infections. *J Transl Med*. 2019;17(1):284. doi:10.1186/s12967-019-2040-y
13. Esposito S, Marchisio P, Cavagna R, et al. Effectiveness of influenza vaccination of children with recurrent respiratory tract infections in reducing respiratory-related morbidity within the households. *Vaccine*. 2003;21(23):3162-8. doi:10.1016/s0264-410x(03)00253-6
14. Bugova G, Janickova M, Uhliarova B, et al. The effect of passive smoking on bacterial colonisation of the upper airways and selected laboratory parameters in children. *Acta Otorhinolaryngol Ital*. 2018;38(5):431-8. doi:10.14639/0392-100X-1573
15. Leach AJ, Morris PS. Antibiotics for the prevention of acute and chronic suppurative otitis media in children. *Cochrane Database Syst Rev*. 2006(4):CD004401. doi:10.1002/14651858.CD004401.pub2
16. Chintu C, Bhat GJ, Walker AS, et al. Co-trimoxazole as prophylaxis against opportunistic infections in HIV-infected Zambian children (CHAP): a double-blind randomised placebo-controlled trial. *Lancet*. 2004;364(9448):1865-71. doi:10.1016/S0140-6736(04)17442-4
17. Hughes WT, Kuhn S, Chaudhary S, et al. Successful chemoprophylaxis for *Pneumocystis carinii* pneumonitis. *N Engl J Med*. 1977;297(26):1419-26. doi:10.1056/NEJM197712292972602
18. Genel F, Kutukculer N. Prospective, randomized comparison of OM-85 BV and a prophylactic antibiotic in children with recurrent infections and immunoglobulin A and/or G subclass deficiency. *Curr Ther Res Clin Exp*. 2003;64(8):600-15. doi:10.1016/j.curtheres.2003.09.008

19. Rankine-Mullings AE, Owusu-Ofori S. Prophylactic antibiotics for preventing pneumococcal infection in children with sickle cell disease. *Cochrane Database Syst Rev.* 2017;10:CD003427. doi:10.1002/14651858.CD003427.pub4
20. Saiman L, Anstead M, Mayer-Hamblett N, et al. Effect of azithromycin on pulmonary function in patients with cystic fibrosis uninfected with *Pseudomonas aeruginosa*: a randomized controlled trial. *JAMA.* 2010;303(17):1707-15. doi:10.1001/jama.2010.563
21. Clement A, Tamalet A, Leroux E, et al. Long term effects of azithromycin in patients with cystic fibrosis: A double blind, placebo controlled trial. *Thorax.* 2006;61(10):895-902. doi:10.1136/thx.2005.057950
22. Church JA, Fitzgerald F, Walker AS, et al. The expanding role of co-trimoxazole in developing countries. *Lancet Infect Dis.* 2015;15(3):327-39. doi:10.1016/S1473-3099(14)71011-4
23. Ghilchik MW, Morris AS, Reeves DS. Immunosuppressive powers of the antibacterial agent trimethoprim. *Nature.* 1970;227(5256):393-4. doi:10.1038/227393a0
24. Rozin A, Schapira D, Braun-Moscovici Y, et al. Cotrimoxazole treatment for rheumatoid arthritis. *Semin Arthritis Rheum.* 2001;31(2):133-41. doi:10.1053/sarh.2001.27734
25. Emmanouilides CE, Lianou PE, Bassaris HP, et al. Trimethoprim, sulphamethoxazole, bacterial adhesion and polymorphonuclear leucocyte function. *J Antimicrob Chemother.* 1990;26(6):803-12. doi:10.1093/jac/26.6.803
26. Wolf J. Antibiotic resistance threatens the efficacy of prophylaxis. *Lancet Infect Dis.* 2015;15(12):1368-9. doi:10.1016/S1473-3099(15)00317-5
27. Pettigrew MM, Johnson JK, Harris AD. The human microbiota: novel targets for hospital-acquired infections and antibiotic resistance. *Ann Epidemiol.* 2016;26(5):342-7. doi:10.1016/j.annepidem.2016.02.007
28. Bedford Russell AR, Murch SH. Could peripartum antibiotics have delayed health consequences for the infant? *BJOG.* 2006;113(7):758-65. doi:10.1111/j.1471-0528.2006.00952.x
29. Moore AM, Patel S, Forsberg KJ, et al. Pediatric fecal microbiota harbor diverse and novel antibiotic resistance genes. *PLoS One.* 2013;8(11):e78822. doi:10.1371/journal.pone.0078822
30. Reyman M, van Houten MA, van Baarle D, et al. Impact of delivery mode-associated gut microbiota dynamics on health in the first year of life. *Nat Commun.* 2019;10(1):4997. doi:10.1038/s41467-019-13014-7
31. Sommer MO, Dantas G. Antibiotics and the resistant microbiome. *Curr Opin Microbiol.* 2011;14(5):556-63. doi:10.1016/j.mib.2011.07.005
32. Bogaert D, de GR, Hermans PW. Streptococcus pneumoniae colonisation: the key to pneumococcal disease. *Lancet Infect Dis.* 2004;4(3):144-54.
33. Biesbroek G, Sanders EA, Roeselers G, et al. Deep sequencing analyses of low density microbial communities: working at the boundary of accurate microbiota detection. *PLoS one.* 2012;7(3):e32942. doi:10.1371/journal.pone.0032942
34. Gruber C, Keil T, Kulig M, et al. History of respiratory infections in the first 12 yr among children from a birth cohort. *Pediatr Allergy Immunol.* 2008;19(6):505-12. doi:10.1111/j.1399-3038.2007.00688.x
35. ErasmusMC-Sophia in collaboration with the pulmonary, infectious diseases and immunology section of the Dutch Paediatric Society, Dutch College of General Practitioners (NHG) and 'Stichting kind en ziekenhuis'. (2016). Evidence-based richtlijn diagnostiek naar onderliggende aandoeningen bij kinderen met recidiverende luchtweginfecties. Retrieved from <https://www.kinderinfectieziekten.nl/>.
36. Summary of Product Characteristics (SmPC) CO-TRIMOXAZOL, Medicines Evaluation Board (MEB) The Netherlands, RVG 10550 SPC 0817.23v.RS
37. Prins-van Ginkel AC, de Hoog M, Uiterwaal C, et al. Detecting Acute Otitis Media Symptom Episodes Using a Mobile App: Cohort Study. *JMIR Mhealth Uhealth.* 2017;5(11):e181. doi:10.2196/mhealth.7505
38. R Core Team (2019). R: A language and environment for statistical computing. R Foundation for Statistical Computing, Vienna, Austria. URL <https://www.R-project.org/>.

1  
2  
3 39. Kent DM, Paulus JK, van Klaveren D, et al. The Predictive Approaches to Treatment effect  
4 Heterogeneity (PATH) Statement. *Ann Intern Med*. 2019. doi:10.7326/M18-3667

5 40. Man WH, van Houten MA, Merelle ME, et al. Bacterial and viral respiratory tract microbiota  
6 and host characteristics in children with lower respiratory tract infections: a matched case-control  
7 study. *Lancet Respir Med*. 2019;7(5):417-26. doi:10.1016/S2213-2600(18)30449-1  
8  
9  
10  
11  
12  
13  
14  
15  
16  
17  
18  
19  
20  
21  
22  
23  
24  
25  
26  
27  
28  
29  
30  
31  
32  
33  
34  
35  
36  
37  
38  
39  
40  
41  
42  
43  
44  
45  
46  
47  
48  
49  
50  
51  
52  
53  
54  
55  
56  
57  
58  
59  
60

For peer review only

### **Authors' contributions**

All authors helped with the design of this study and approved the final manuscript. DP, LMV and GD wrote the first draft of the study protocol and manuscript. NG was consulted for the statistical analysis plan for this study. LV helped designing the trial medication and advised on improving safety measures in relation to the trial medication. DB was consulted for the secondary outcomes on microbiota composition and AMR genes. AvR was consulted for the design of the study.

### **Funding statement**

This study was supported by the Elisabeth von Freyburg fonds, 'Stichting Kiddy Goodpills' and the Haga Teaching Hospital. Award/Grant number is not applicable.

### **Competing interests statement**

None declared.

### **Ethics approval**

This study has been approved by the Medical Research Ethics committee LDD (Leiden, The Netherlands) and is registered in the Netherlands National Trial Register (NTR) as Trial NL7044.

Supplementary file 1

**Monthly questionnaire for participants of the Approach study**

1. Did you consult a physician for your child because of a respiratory tract infection in the past month?

- Yes, the paediatrician of our own hospital
- Yes, the general practitioner
- Yes, the otolaryngologist
- Yes, another physician
- No

1b. If yes, how many times did your child visit a physician because of a respiratory tract infection in the past month?

2. Did you consult a physician for your child because of a stomach infection or gastro-enteritis in the past month?

- Yes, the paediatrician of our own hospital
- Yes, the general practitioner
- Yes, another physician
- No

2b. If yes, how many times did your child visit a physician because of a stomach infection or gastro-enteritis in the past month?

3. Did your child take any antibiotics in the past month?

- Yes, prescribed by the paediatrician of our own hospital
- Yes, prescribed by the general practitioner
- Yes, prescribed by the otolaryngologist
- Yes, prescribed by another physician
- No

*Question 4 and 5 are only applicable if question 3 is answered 'Yes'.*

4. How many antibiotic regimens did your child use in the past month?

*The (sub)questions of question 5 are asked for every antibiotic regimen separately.*

5a. For what infection was your child treated with antibiotics? (multiple choice)

- Rhinitis
- Otitis
- Tonsillitis
- Bronchitis or pulmonary infection
- Stomach infection or gastroenteritis
- Other infection (other than respiratory or gastro-intestinal infection)

5b. Which date did your child start with the antibiotic treatment?

DD/MM/YYYY

5c. Which date did your child stop with the antibiotic treatment?

DD/MM/YYYY

1  
2  
3  
4 5d. What is the name of the antibiotic regimen?  
5

6 6. Did your child get any vaccines in the past month? (multiple choice)  
7

- 8  No  
9  DKTP-Hib-HepB  
10  Pneumococcal  
11  MMR  
12  Meningococcal C  
13  Other vaccine  
14

15  
16 7. Has your child been admitted to the hospital because of an (suspected) infection in the past  
17 month?  
18

- 19  Yes  
20  No  
21

22 7b. If yes, for what infection was your child admitted to the hospital? (multiple choice)  
23

- 24  Rhinitis  
25  Otitis  
26  Throat infection / tonsillitis  
27  Bronchitis or pulmonary infection  
28  Stomach infection or gastroenteritis  
29  Other infection (other than respiratory or gastro-intestinal infection)  
30

31 7c. If yes, how many days has your child been admitted to the hospital in the past month?  
32

33 8. Did your child visit any form of day-care or school in the past month?  
34

- 35  Yes  
36  No  
37

38 8b. If yes, how many half days\* did your child visit day-care / school in the past month?  
39

40 8c. If yes, how many half days\* did your child miss from day-care / school because of an infection in  
41 the past month?  
42

43 \* A half day is a morning or an afternoon.  
44

45 9. Did you or your partner miss work due to your child having an infection during the past three  
46 months?  
47

- 48  Yes  
49  No  
50

51 9b. If yes, how many half days\* did you and your partner miss combined?  
52

53 \* A half day is a morning or an afternoon.  
54

55 10. Do you have any additional comments about the past month?  
56  
57  
58  
59  
60





## CONSORT 2010 checklist of information to include when reporting a randomised trial\*

| Section/Topic                    | Item No | Checklist item                                                                                                                                                                              | Reported on page No |
|----------------------------------|---------|---------------------------------------------------------------------------------------------------------------------------------------------------------------------------------------------|---------------------|
| <b>Title and abstract</b>        |         |                                                                                                                                                                                             |                     |
|                                  | 1a      | Identification as a randomised trial in the title                                                                                                                                           | 1                   |
|                                  | 1b      | Structured summary of trial design, methods, results, and conclusions (for specific guidance see CONSORT for abstracts)                                                                     | 2                   |
| <b>Introduction</b>              |         |                                                                                                                                                                                             |                     |
| Background and objectives        | 2a      | Scientific background and explanation of rationale                                                                                                                                          | 4-5                 |
|                                  | 2b      | Specific objectives or hypotheses                                                                                                                                                           | 5-6                 |
| <b>Methods</b>                   |         |                                                                                                                                                                                             |                     |
| Trial design                     | 3a      | Description of trial design (such as parallel, factorial) including allocation ratio                                                                                                        | 6-7                 |
|                                  | 3b      | Important changes to methods after trial commencement (such as eligibility criteria), with reasons                                                                                          | NA                  |
| Participants                     | 4a      | Eligibility criteria for participants                                                                                                                                                       | 7 (table 1)         |
|                                  | 4b      | Settings and locations where the data were collected                                                                                                                                        | 7-8                 |
| Interventions                    | 5       | The interventions for each group with sufficient details to allow replication, including how and when they were actually administered                                                       | 6-8                 |
| Outcomes                         | 6a      | Completely defined pre-specified primary and secondary outcome measures, including how and when they were assessed                                                                          | 5-6                 |
|                                  | 6b      | Any changes to trial outcomes after the trial commenced, with reasons                                                                                                                       | NA                  |
| Sample size                      | 7a      | How sample size was determined                                                                                                                                                              | 9                   |
|                                  | 7b      | When applicable, explanation of any interim analyses and stopping guidelines                                                                                                                | NA                  |
| <b>Randomisation:</b>            |         |                                                                                                                                                                                             |                     |
| Sequence generation              | 8a      | Method used to generate the random allocation sequence                                                                                                                                      | 7                   |
|                                  | 8b      | Type of randomisation; details of any restriction (such as blocking and block size)                                                                                                         | 7                   |
| Allocation concealment mechanism | 9       | Mechanism used to implement the random allocation sequence (such as sequentially numbered containers), describing any steps taken to conceal the sequence until interventions were assigned | 7                   |
| Implementation                   | 10      | Who generated the random allocation sequence, who enrolled participants, and who assigned participants to interventions                                                                     | 7-8                 |
| Blinding                         | 11a     | If done, who was blinded after assignment to interventions (for example, participants, care providers, those                                                                                | 7                   |

|                                                      |     |                                                                                                                                                   |      |
|------------------------------------------------------|-----|---------------------------------------------------------------------------------------------------------------------------------------------------|------|
|                                                      |     | assessing outcomes) and how                                                                                                                       |      |
|                                                      | 11b | If relevant, description of the similarity of interventions                                                                                       | -    |
| Statistical methods                                  | 12a | Statistical methods used to compare groups for primary and secondary outcomes                                                                     | 9-11 |
|                                                      | 12b | Methods for additional analyses, such as subgroup analyses and adjusted analyses                                                                  | 9-11 |
| <b>Results</b>                                       |     |                                                                                                                                                   |      |
| Participant flow (a diagram is strongly recommended) | 13a | For each group, the numbers of participants who were randomly assigned, received intended treatment, and were analysed for the primary outcome    | NA   |
|                                                      | 13b | For each group, losses and exclusions after randomisation, together with reasons                                                                  | NA   |
| Recruitment                                          | 14a | Dates defining the periods of recruitment and follow-up                                                                                           | NA   |
|                                                      | 14b | Why the trial ended or was stopped                                                                                                                | NA   |
| Baseline data                                        | 15  | A table showing baseline demographic and clinical characteristics for each group                                                                  | NA   |
| Numbers analysed                                     | 16  | For each group, number of participants (denominator) included in each analysis and whether the analysis was by original assigned groups           | NA   |
| Outcomes and estimation                              | 17a | For each primary and secondary outcome, results for each group, and the estimated effect size and its precision (such as 95% confidence interval) | NA   |
|                                                      | 17b | For binary outcomes, presentation of both absolute and relative effect sizes is recommended                                                       | NA   |
| Ancillary analyses                                   | 18  | Results of any other analyses performed, including subgroup analyses and adjusted analyses, distinguishing pre-specified from exploratory         | NA   |
| Harms                                                | 19  | All important harms or unintended effects in each group (for specific guidance see CONSORT for harms)                                             | NA   |
| <b>Discussion</b>                                    |     |                                                                                                                                                   |      |
| Limitations                                          | 20  | Trial limitations, addressing sources of potential bias, imprecision, and, if relevant, multiplicity of analyses                                  | 1-2  |
| Generalisability                                     | 21  | Generalisability (external validity, applicability) of the trial findings                                                                         | -    |
| Interpretation                                       | 22  | Interpretation consistent with results, balancing benefits and harms, and considering other relevant evidence                                     | -    |
| <b>Other information</b>                             |     |                                                                                                                                                   |      |
| Registration                                         | 23  | Registration number and name of trial registry                                                                                                    | 1    |
| Protocol                                             | 24  | Where the full trial protocol can be accessed, if available                                                                                       | NA   |
| Funding                                              | 25  | Sources of funding and other support (such as supply of drugs), role of funders                                                                   | 15   |

\*We strongly recommend reading this statement in conjunction with the CONSORT 2010 Explanation and Elaboration for important clarifications on all the items. If relevant, we also recommend reading CONSORT extensions for cluster randomised trials, non-inferiority and equivalence trials, non-pharmacological treatments, herbal interventions, and pragmatic trials. Additional extensions are forthcoming: for those and for up to date references relevant to this checklist, see [www.consort-statement.org](http://www.consort-statement.org).
